# Supplementary material for: Integrating Epigenomic Elements and GWASs Identifies BDNF Gene Affecting Bone Mineral Density and Osteoporotic Fracture Risk
Source: PubMed Central journal article supplement (PMC4964617; doi:10.1038/srep30558), 2016-07-28
Supplement: srep30558-s1.pdf [file srep30558-s1.pdf]

# **Integrating Epigenomic Elements and GWASs Identifies *BDNF* Gene Affecting Bone Mineral Density and Osteoporotic Fracture Risk**

Yan Guo<sup>1</sup>, Shan-Shan Dong<sup>1</sup>, Xiao-Feng Chen<sup>1</sup>, Ying-Aisha Jing<sup>1</sup>, Man Yang<sup>1</sup>, Han Yan<sup>1</sup>, Hui Shen<sup>2</sup>, Xiang-Ding Chen<sup>3</sup>, Li-Jun Tan<sup>3</sup>, Qing Tian<sup>2</sup>, Hong-Wen Deng<sup>2</sup>, Tie-Lin Yang<sup>1\*</sup>

<sup>1</sup> Key Laboratory of Biomedical Information Engineering of Ministry of Education, School of Life Science and Technology, Xi'an Jiaotong University, Xi'an 710049, P. R. China

<sup>2</sup> School of Public Health and Tropical Medicine, Tulane University  
New Orleans, LA 70112, USA

<sup>3</sup> Laboratory of Molecular and Statistical Genetics, College of Life Sciences, Hunan Normal University, Changsha 410081, P. R. China

## **Supplementary Tables**

**Table S1. List of osteoporosis-associated genes obtained from the GWAS Catalog and PheGenI database.** A total of 259 osteoporosis-associated genes were included.

**Table S2. Pathway enrichment analysis for the osteoporosis-associated genes.** Pathways with nominal *P* value < 0.05 are shown.

**Table S3. Functional enrichment analysis for all the epigenomic elements used in this study.** For each element, the  $-\log_{10}$  transformed enrichment *P*-values for the osteoporosis-associated gene are shown, along with the *P*-values for the randomly selected genes set of the same size. Epigenomic elements enriched with *P* -value < 0.01 are highlighted in red while depleted epigenomic elements with *P* -value < 0.01 are highlighted in

green.

**Table S4. Cell types used to obtain epigenomic elements.** Information was obtained from <https://genome.ucsc.edu/encode/cellTypes.html>.

**Table S5. siRNA sequences for *BDNF*.**

**Table S6. Primer sequences for PCR analyses.**

Table S1. List of osteoporosis-associated genes obtained from the GWAS Catalog and PheGenI database.

| Gene     | Full name                                                                         | Chromosome | Pathway enriched                            |
|----------|-----------------------------------------------------------------------------------|------------|---------------------------------------------|
| ABCF2    | ATP-binding cassette, sub-family F (GCN20), member 2                              | 7q36       |                                             |
| ACTL8    | actin-like 8                                                                      | 1p36.13    |                                             |
| ADAMTS18 | ADAM metalloproteinase with thrombospondin type 1 motif, 18                       | 16q23      |                                             |
| ADGRV1   | adhesion G protein-coupled receptor V1                                            | 5q13       |                                             |
| ADORA3   | adenosine A3 receptor                                                             | 1p13.2     | cGMP-PKG signaling pathway                  |
| AKAP11   | A kinase (PRKA) anchor protein 11                                                 | 13q14.11   |                                             |
| AMPH     | amphiphysin                                                                       | 7p14-p13   | Fc gamma R-mediated phagocytosis            |
| ANAPC1   | anaphase promoting complex subunit 1                                              | 2q12.1     | HTLV-I infection                            |
| ARHGAP1  | Rho GTPase activating protein 1                                                   | 11p11.2    |                                             |
| ARHGAP10 | Rho GTPase activating protein 10                                                  | 4q31.23    | Bacterial invasion of epithelial cells      |
| ATL2     | atlastin GTPase 2                                                                 | 2p22.3     |                                             |
| ATXN3L   | ataxin 3-like                                                                     | Xp22.2     | Protein processing in endoplasmic reticulum |
| AXIN1    | axin 1                                                                            | 16p13.3    | Wnt signaling pathway                       |
| BET1L    | Bet1 golgi vesicular membrane trafficking protein-like                            | 11p15.5    | SNARE interactions in vesicular transport   |
| BOC      | BOC cell adhesion associated, oncogene regulated                                  | 3q13.2     |                                             |
| BPIFA3   | BPI fold containing family A, member 3                                            | 20q11.21   |                                             |
| C10orf90 | chromosome 10 open reading frame 90                                               | 10q26.2    |                                             |
| C17orf53 | chromosome 17 open reading frame 53                                               | 17q21.31   |                                             |
| C3orf17  | chromosome 3 open reading frame 17                                                | 3q13.2     |                                             |
| C6orf10  | chromosome 6 open reading frame 10                                                | 6p21.3     |                                             |
| CACNA1D  | calcium channel, voltage-dependent, L type, alpha 1D subunit                      | 3p14.3     | cGMP-PKG signaling pathway                  |
| CBR3     | carbonyl reductase 3                                                              | 21q22.2    | Metabolic pathways                          |
| CCDC158  | coiled-coil domain containing 158                                                 | 4q21.1     |                                             |
| CCDC170  | coiled-coil domain containing 170                                                 | 6q25.1     |                                             |
| CCDC34   | coiled-coil domain containing 34                                                  | 11p14.1    |                                             |
| CD38     | CD38 molecule                                                                     | 4p15       | Pancreatic secretion                        |
| CDC42EP3 | CDC42 effector protein (Rho GTPase binding) 3                                     | 2p21       |                                             |
| CDH13    | cadherin 13                                                                       | 16q23.3    |                                             |
| CDKAL1   | CDK5 regulatory subunit associated protein 1-like 1                               | 6p22.3     |                                             |
| CENPW    | centromere protein W                                                              | 6q22.32    |                                             |
| CEP170   | centrosomal protein 170kDa                                                        | 1q44       |                                             |
| CETN3    | centrin, EF-hand protein, 3                                                       | 5q14.3     |                                             |
| CITED2   | Cbp/p300-interacting transactivator, with Glu/Asp-rich carboxy-terminal domain, 2 | 6q23.3     |                                             |
| CKAP5    | cytoskeleton associated protein 5                                                 | 11p11.2    |                                             |
| CLDN14   | claudin 14                                                                        | 21q22.3    | Leukocyte transendothelial migration        |
| CLEC10A  | C-type lectin domain family 10, member A                                          | 17p13.1    | Cell adhesion molecules (CAMs)              |

|           |                                                      |                |                                                   |
|-----------|------------------------------------------------------|----------------|---------------------------------------------------|
| CNTNAP2   | contactin associated protein-like 2                  | 7q35           |                                                   |
| COL11A1   | collagen, type XI, alpha 1                           | 1p21           | Focal adhesion                                    |
| COLEC10   | collectin sub-family member 10 (C-type lectin)       | 8q23-24.1      |                                                   |
| COPS8P1   | COP9 signalosome subunit 8 pseudogene 1              | Xq21.2         |                                                   |
| CPED1     | cadherin-like and PC-esterase domain containing 1    | 7q31.31        |                                                   |
| CPN1      | carboxypeptidase N, polypeptide 1                    | 10q24.2        |                                                   |
| CRBN      | cereblon                                             | 3p26.2         |                                                   |
| CRHR1     | corticotropin releasing hormone receptor 1           | 17q21.31       | Long-term depression                              |
| CRHR1-IT1 | CRHR1 intronic transcript 1                          | 17q21.31       |                                                   |
| CRYGFP    | crystallin, gamma F pseudogene                       | 2q34           |                                                   |
| CSMD1     | CUB and Sushi multiple domains 1                     | 8p23.2         |                                                   |
| CSRNP3    | cysteine-serine-rich nuclear protein 3               | 2q24.3         |                                                   |
| CTNNB1    | catenin (cadherin-associated protein), beta 1, 88kDa | 3p21           | Wnt signaling pathway                             |
| CTNNBL1   | catenin, beta like 1                                 | 20q11.23-q11.2 | Spliceosome                                       |
| CYCSP6    | cytochrome c, somatic pseudogene 6                   | 2p12           |                                                   |
| CYLD      | cylindromatosis (turban tumor syndrome)              | 16q12.1        | Osteoclast differentiation                        |
| DCDC1     | doublecortin domain containing 1                     | 11p13          |                                                   |
| DCDC5     | doublecortin domain containing 5                     | 11p14.1        |                                                   |
| DECR1     | 2,4-dienoyl CoA reductase 1, mitochondrial           | 8q21.3         |                                                   |
| DGKB      | diacylglycerol kinase, beta 90kDa                    | 7p21.2         | Metabolic pathways                                |
| DHH       | desert hedgehog                                      | 12q13.1        | Hedgehog signaling pathway                        |
| DIRAS3    | DIRAS family, GTP-binding RAS-like 3                 | 1p31           |                                                   |
| DKK1      | dickkopf WNT signaling pathway inhibitor 1           | 10q11.2        | Wnt signaling pathway                             |
| DNAJC6    | DnaJ (Hsp40) homolog, subfamily C, member 6          | 1p31.3         | Endocytosis                                       |
| DNM3      | dynamamin 3                                          | 1q24.3         | Bacterial invasion of epithelial cells            |
| DOCK1     | dedicator of cytokinesis 1                           | 10q26.13-q26.3 | Bacterial invasion of epithelial cells            |
| DPT       | dermatopontin                                        | 1q12-q23       |                                                   |
| E2F7      | E2F transcription factor 7                           | 12q21.2        |                                                   |
| EGFL6     | EGF-like-domain, multiple 6                          | Xp22           |                                                   |
| EPDR1     | ependymin related 1                                  | 7p14.1         |                                                   |
| ERC1      | ELKS/RAB6-interacting/CAST family member 1           | 12p13.3        | NF-kappa B signaling pathway                      |
| ERCC4     | excision repair cross-complementation group 4        | 16p13.12       | Nucleotide excision repair/Fanconi anemia pathway |
| ESR1      | estrogen receptor 1                                  | 6q25.1         | Estrogen signaling pathway                        |
| EYA4      | EYA transcriptional coactivator and phosphatase 4    | 6q23           |                                                   |
| FABP3P2   | fatty acid binding protein 3, pseudogene 2           | 13q13-q14      |                                                   |
| FAM155A   | family with sequence similarity 155, member A        | 13q33.3        |                                                   |
| FAM174A   | family with sequence similarity 174, member A        | 5q21.1         |                                                   |
| FAM210A   | family with sequence similarity 210, member A        | 18p11.21       |                                                   |
| FAM3C     | family with sequence similarity 3, member C          | 7q31           |                                                   |
| FAM46A    | family with sequence similarity 46, member A         | 6q14           |                                                   |
| FAM84A    | family with sequence similarity 84, member A         | 2p24.3         |                                                   |
| FAR1      | fatty acyl CoA reductase 1                           | 11p15.2        | Peroxisome                                        |
| FBXO15    | F-box protein 15                                     | 18q22.3        |                                                   |
| FGF14     | fibroblast growth factor 14                          | 13q34          | MAPK signaling pathway                            |

|           |                                                                                       |                |                                     |
|-----------|---------------------------------------------------------------------------------------|----------------|-------------------------------------|
| FGFRL1    | fibroblast growth factor receptor-like 1                                              | 4p16           |                                     |
| FMN2      | formin 2                                                                              | 1q43           | Dorso-ventral axis formation        |
| FOXL1     | forkhead box L1                                                                       | 16q24          |                                     |
| FSIP1     | fibrous sheath interacting protein 1                                                  | 15q14          |                                     |
| FUBP3     | far upstream element (FUSE) binding protein 3                                         | 9q34.11        |                                     |
| GABPB1    | GA binding protein transcription factor, beta subunit 1                               | 15q21.2        |                                     |
| GALNT3    | polypeptide N-acetylgalactosaminyltransferase 3                                       | 2q24-q31       | Metabolic pathways                  |
| GPATCH1   | G patch domain containing 1                                                           | 19q13.11       |                                     |
| GRB10     | growth factor receptor-bound protein 10                                               | 7p12.2         |                                     |
| HAO2      | hydroxyacid oxidase 2 (long chain)                                                    | 1p12           | Peroxisome                          |
| HDAC5     | histone deacetylase 5                                                                 | 17q21          | Epstein-Barr virus infection        |
| HDAC9     | histone deacetylase 9                                                                 | 7p21.1         |                                     |
| HDGFL1    | hepatoma derived growth factor-like 1                                                 | 6p22.3         |                                     |
| HERPUD2   | HERPUD family member 2                                                                | 7p14.2         |                                     |
| HK2       | hexokinase 2                                                                          | 2p13           | Type II diabetes mellitus           |
| HLA-E     | major histocompatibility complex, class I, E                                          | 6p21.3         | HTLV-I infection                    |
| HMGN2P6   | high mobility group nucleosomal binding domain 2<br>pseudogene 6                      | 14q12          | HTLV-I infection                    |
| HOXC6     | homeobox C6                                                                           | 12q13.3        |                                     |
| HPDL      | 4-hydroxyphenylpyruvate dioxygenase-like                                              | 1p34.1         |                                     |
| HSP90AB3P | heat shock protein 90kDa alpha (cytosolic), class B<br>member 3, pseudogene           | 4q22.1         |                                     |
| HSPA13    | heat shock protein 70kDa family, member 13                                            | 21q11          |                                     |
| IBSP      | integrin-binding sialoprotein                                                         | 4q21.1         | ECM-receptor interaction            |
| IDUA      | iduronidase, alpha-L-                                                                 | 4p16.3         | Metabolic pathways                  |
| IGSF21    | immunoglobulin superfamily, member 21                                                 | 1p36.13        |                                     |
| IL21R     | interleukin 21 receptor                                                               | 16p11          | Inflammatory bowel disease<br>(IBD) |
| INO80     | INO80 complex subunit                                                                 | 15q15.1        |                                     |
| INSC      | inscuteable homolog (Drosophila)                                                      | 11p15.2        |                                     |
| INSIG2    | insulin induced gene 2                                                                | 2q14.2         |                                     |
| JAG1      | jagged 1                                                                              | 20p12.1-p11.23 | Notch signaling pathway             |
| KCNMA1    | potassium channel, calcium activated large<br>conductance subfamily M alpha, member 1 | 10q22.3        | cGMP-PKG signaling pathway          |
| KCNS3     | potassium voltage-gated channel, modifier subfamily S,<br>member 3                    | 2p24           |                                     |
| KIAA2018  | KIAA2018                                                                              | 3q13.2         |                                     |
| KLF6      | Kruppel-like factor 6                                                                 | 10p15          |                                     |
| KLHL4     | kelch-like family member 4                                                            | Xq21.3         |                                     |
| KLHL42    | kelch-like family member 42                                                           | 12p11.22       |                                     |
| LEKR1     | leucine, glutamate and lysine rich 1                                                  | 3q25.31        |                                     |
| LEMD3     | LEM domain containing 3                                                               | 12q14          |                                     |
| LGR4      | leucine-rich repeat containing G protein-coupled<br>receptor 4                        | 11p14-p13      |                                     |
| LIN7C     | lin-7 homolog C (C. elegans)                                                          | 11p14          |                                     |
| LOC344382 | serine/threonine kinase receptor associated protein<br>pseudogene                     | 2p22.2         |                                     |
| LRP4      | low density lipoprotein receptor-related protein 4                                    | 11p11.2        |                                     |
| LRP5      | low density lipoprotein receptor-related protein 5                                    | 11q13.4        |                                     |

|           |                                                                  |               |                                      |
|-----------|------------------------------------------------------------------|---------------|--------------------------------------|
| LRRN1     | leucine rich repeat neuronal 1                                   | 3p26.2        |                                      |
| MAPT      | microtubule-associated protein tau                               | 17q21.1       | MAPK signaling pathway               |
| 11-Mar    | membrane-associated ring finger (C3HC4) 11                       | 5p15.1        |                                      |
| MARK3     | MAP/microtubule affinity-regulating kinase 3                     | 14q32.32      |                                      |
| MBL2      | mannose-binding lectin (protein C) 2, soluble                    | 10q11.2       | Phagosome                            |
| MCUR1     | mitochondrial calcium uniporter regulator 1                      | 6p23          |                                      |
| MEF2C     | myocyte enhancer factor 2C                                       | 5q14.3        | cGMP-PKG signaling pathway           |
| MEPE      | matrix extracellular phosphoglycoprotein                         | 4q21.1        | cGMP-PKG signaling pathway           |
| MPHOSPH6  | M-phase phosphoprotein 6                                         | 16q23.3       | RNA degradation                      |
| MPP7      | membrane protein, palmitoylated 7 (MAGUK p55 subfamily member 7) | 10p12.1       |                                      |
| MRPL11P3  | mitochondrial ribosomal protein L11 pseudogene 3                 | 12q21.2       |                                      |
| MRPS18BP2 | mitochondrial ribosomal protein S18B pseudogene 2                | 2q22.1        |                                      |
| MRPS31P1  | mitochondrial ribosomal protein S31 pseudogene 1                 | 3p21.33       |                                      |
| NAV3      | neuron navigator 3                                               | 12q14.3       |                                      |
| NBAS      | neuroblastoma amplified sequence                                 | 2p24          |                                      |
| NETO1     | neuropilin (NRP) and tolloid (TLL)-like 1                        | 18q22.2       |                                      |
| NME8      | NME/NM23 family member 8                                         | 7p14.1        |                                      |
| NOTCH4    | notch 4                                                          | 6p21.3        | Dorso-ventral axis formation         |
| NR5A2     | nuclear receptor subfamily 5, group A, member 2                  | 1q32.1        | Maturity onset diabetes of the young |
| NRSN1     | neurensin 1                                                      | 6p22.3        |                                      |
| NTAN1     | N-terminal asparagine amidase                                    | 16p13.11      |                                      |
| OMA1      | OMA1 zinc metallopeptidase                                       | 1p32.2-32.1   |                                      |
| OR2BH1P   | olfactory receptor, family 2, subfamily BH, member 1 pseudogene  | 11p14.1       |                                      |
| OR7E156P  | olfactory receptor, family 7, subfamily E, member 156 pseudogene | 13q21.31      |                                      |
| OR7K1P    | olfactory receptor, family 7, subfamily K, member 1 pseudogene   | 14q12         |                                      |
| P4HA3     | prolyl 4-hydroxylase, alpha polypeptide III                      | 11q13.4       | Metabolic pathways                   |
| PABPC4L   | poly(A) binding protein, cytoplasmic 4-like                      | 4q28.3        | RNA degradation                      |
| PCDH10    | protocadherin 10                                                 | 4q28.3        |                                      |
| PCNT      | pericentrin                                                      | 21q22.3       |                                      |
| PITRM1    | pitrilysin metallopeptidase 1                                    | 10p15.2       |                                      |
| PKDCC     | protein kinase domain containing, cytoplasmic                    | 2p21          |                                      |
| PKIA      | protein kinase (cAMP-dependent, catalytic) inhibitor alpha       | 8q21.12       | Alcoholism                           |
| PLCL1     | phospholipase C-like 1                                           | 2q33          | GABAergic synapse                    |
| PPIAP7    | peptidylprolyl isomerase A (cyclophilin A) pseudogene 7          | 1p21.2        |                                      |
| PPP6R3    | protein phosphatase 6, regulatory subunit 3                      | 11q13         |                                      |
| PRICKLE1  | prickle homolog 1                                                | 12q12         | Wnt signaling pathway                |
| PRKCE     | protein kinase C, epsilon                                        | 2p21          | cGMP-PKG signaling pathway           |
| PRKG2     | protein kinase, cGMP-dependent, type II                          | 4q13.1-q21.1  | cGMP-PKG signaling pathway           |
| PSMA2     | proteasome (prosome, macropain) subunit, alpha type, 2           | 7p13          | cGMP-PKG signaling pathway           |
| PTH       | parathyroid hormone                                              | 11p15.3-p15.1 |                                      |
| PTH2R     | parathyroid hormone 2 receptor                                   | 2q33          |                                      |

|           |                                                              |               |                        |
|-----------|--------------------------------------------------------------|---------------|------------------------|
| PTH LH    | parathyroid hormone-like hormone                             | 12p12.1-p11.2 |                        |
| PTX4      | pentraxin 4, long                                            | 16p13.3       |                        |
| RAF1P1    | RAF1 pseudogene 1                                            | 4p16.1        |                        |
| RAP1A     | RAP1A, member of RAS oncogene family                         | 1p13.3        |                        |
| RASGEF1B  | RasGEF domain family, member 1B                              | 4q21.21       |                        |
| RBMS3     | RNA binding motif, single stranded interacting protein 3     | 3p24-p23      |                        |
| RDH14     | retinol dehydrogenase 14 (all-trans/9-cis/11-cis)            | 2p24.2        |                        |
| REG3G     | regenerating islet-derived 3 gamma                           | 2p12          |                        |
| RE RE     | arginine-glutamic acid dipeptide (RE) repeats                | 1p36.23       |                        |
| RGS8      | regulator of G-protein signaling 8                           | 1q25          |                        |
| RIN3      | Ras and Rab interactor 3                                     | 14q32.12      |                        |
| RMDN2     | regulator of microtubule dynamics 2                          | 2p22.2        |                        |
| RNU7-80P  | RNA, U7 small nuclear 80 pseudogene                          | 1p31.3        |                        |
| RORA      | RAR-related orphan receptor A                                | 15q22.2       |                        |
| RPL17P25  | ribosomal protein L17 pseudogene 25                          | 6q14.1        |                        |
| RPL17P44  | ribosomal protein L17 pseudogene 44                          | 18q21.33      |                        |
| RPL19P8   | ribosomal protein L19 pseudogene 8                           | 4q34.3        |                        |
| RPL23AP27 | ribosomal protein L23a pseudogene 27                         | 2q12.1        |                        |
| RPL31P48  | ribosomal protein L31 pseudogene 48                          | 12q21.1       |                        |
| RPL32P28  | ribosomal protein L32 pseudogene 28                          | 13q21.31      |                        |
| RPL36AP25 | ribosomal protein L36a pseudogene 25                         | 6p22.3        |                        |
| RPL39P30  | ribosomal protein L39 pseudogene 30                          | 16q24.2       |                        |
| RPL3P11   | ribosomal protein L3 pseudogene 11                           | 9p23          |                        |
| RPL6P18   | ribosomal protein L6 pseudogene 18                           | 6p22.3        |                        |
| RPL6P2    | ribosomal protein L6 pseudogene 2                            | 1p12          |                        |
| RPL7AP21  | ribosomal protein L7a pseudogene 21                          | 1q23          |                        |
| RPL9P13   | ribosomal protein L9 pseudogene 13                           | 2q22.1        |                        |
| RPLP0P6   | ribosomal protein, large, P0 pseudogene 6                    | 2p22.1        |                        |
| RPS15AP31 | ribosomal protein S15a pseudogene 31                         | 11p14.1       |                        |
| RPS20P25  | ribosomal protein S20 pseudogene 25                          | 9q21.31       |                        |
| RPS26P35  | ribosomal protein S26 pseudogene 35                          | 8q24.12       |                        |
| RPS27P21  | ribosomal protein S27 pseudogene 21                          | 12q12         |                        |
| RPS27P4   | ribosomal protein S27 pseudogene 4                           | 3p22.1        |                        |
| RPS28P7   | ribosomal protein S28 pseudogene 7                           | 11q14.1       |                        |
| RPS3AP24  | ribosomal protein S3a pseudogene 24                          | 6q24.1        |                        |
| RPS4XP9   | ribosomal protein S4X pseudogene 9                           | 6q22.32       |                        |
| RPS6KA5   | ribosomal protein S6 kinase, 90kDa, polypeptide 5            | 14q31-q32.1   | MAPK signaling pathway |
| RPSAP19   | ribosomal protein SA pseudogene 19                           | 1p21.1        |                        |
| RRP15     | ribosomal RNA processing 15 homolog ( <i>S. cerevisiae</i> ) | 1q41          |                        |
| RSL24D1P4 | ribosomal L24 domain containing 1 pseudogene 4               | 1q43          |                        |
| RSPH14    | radial spoke head 14 homolog ( <i>Chlamydomonas</i> )        | 22q11.2       |                        |
| RSPO3     | R-spondin 3                                                  | 6q22.33       |                        |
| SALL1     | spalt-like transcription factor 1                            | 16q12.1       |                        |
| SAMSN1    | SAM domain, SH3 domain and nuclear localization signals 1    | 21q11         |                        |
| SCYL1     | SCY1-like 1 ( <i>S. cerevisiae</i> )                         | 11q13         |                        |

|           |                                                                                        |              |                                         |
|-----------|----------------------------------------------------------------------------------------|--------------|-----------------------------------------|
| SEMA3C    | sema domain, immunoglobulin domain (Ig), short basic domain, secreted, (semaphorin) 3C | 7q21-q31     | Axon guidance                           |
| SHFM1     | split hand/foot malformation (ectrodactyly) type 1                                     | 7q21.3       | Epstein-Barr virus infection            |
| SHISA9    | shisa family member 9                                                                  | 16p13.12     |                                         |
| SLC16A11  | solute carrier family 16, member 11                                                    | 11p13.1      |                                         |
| SLC25A13  | solute carrier family 25 (aspartate/glutamate carrier), member 13                      | 7q21.3       |                                         |
| SLC4A4    | solute carrier family 4 (sodium bicarbonate cotransporter), member 4                   | 4q21         | Pancreatic secretion                    |
| SMG6      | SMG6 nonsense mediated mRNA decay factor                                               | 17p13.3      | mRNA surveillance pathway               |
| SMOC1     | SPARC related modular calcium binding 1                                                | 14q24.2      |                                         |
| SOST      | sclerostin                                                                             | 17q11.2      | Wnt signaling pathway                   |
| SOX4      | SRY (sex determining region Y)-box 4                                                   | 6p22.3       | MicroRNAs in cancer                     |
| SOX6      | SRY (sex determining region Y)-box 6                                                   | 11p15.3      |                                         |
| SOX9      | SRY (sex determining region Y)-box 9                                                   | 17q24.3      |                                         |
| SP1       | Sp1 transcription factor                                                               | 12q13.1      | Transcriptional misregulation in cancer |
| SP7       | Sp7 transcription factor                                                               | 12q13.13     |                                         |
| SPAG16    | sperm associated antigen 16                                                            | 2q34         |                                         |
| SPOCK1    | sparc/osteonectin, cwcvc and kazal-like domains proteoglycan (testican) 1              | 5q31.2       |                                         |
| SPTBN1    | spectrin, beta, non-erythrocytic 1                                                     | 2p21         |                                         |
| ST8SIA4   | ST8 alpha-N-acetyl-neuraminide alpha-2,8-sialyltransferase 4                           | 5q21         |                                         |
| STARD3NL  | STARD3 N-terminal like                                                                 | 7p14-p13     |                                         |
| SUPT3H    | suppressor of Ty 3 homolog (S. cerevisiae)                                             | 6p21.1-p21.3 | Transcriptional misregulation in cancer |
| TACSTD2   | tumor-associated calcium signal transducer 2                                           | 1p32.2-32.1  |                                         |
| TANC1     | tetratricopeptide repeat, ankyrin repeat and coiled-coil containing 1                  | 2q24.2       |                                         |
| TBX20     | T-box 20                                                                               | 7p14.3       |                                         |
| TENM4     | teneurin transmembrane protein 4                                                       | 11q14.1      |                                         |
| TGFBR3    | transforming growth factor, beta receptor III                                          | 1p33-p32     |                                         |
| TLE1      | transducin-like enhancer of split 1 (E(sp1) homolog, Drosophila)                       | 9q21.32      |                                         |
| TMEM135   | transmembrane protein 135                                                              | 11q14.2      |                                         |
| TMEM182   | transmembrane protein 182                                                              | 2q12.1       |                                         |
| TMEM263   | transmembrane protein 263                                                              | 12q23.3      |                                         |
| TNFRSF11A | tumor necrosis factor receptor superfamily, member 11a, NFKB activator                 | 18q22.1      | Prolactin signaling pathway             |
| TNFRSF11B | tumor necrosis factor receptor superfamily, member 11b                                 | 8q24         | Osteoclast differentiation              |
| TNFSF11   | tumor necrosis factor (ligand) superfamily, member 11                                  | 13q14        | Prolactin signaling pathway             |
| TRPC7     | transient receptor potential cation channel, subfamily C, member 7                     | 5q31.1       |                                         |
| TSPAN7    | tetraspanin 7                                                                          | Xp11.4       |                                         |
| UBBP2     | ubiquitin B pseudogene 2                                                               | 1q32         |                                         |
| UMOD      | uromodulin                                                                             | 16p12.3      |                                         |
| UPK3B     | uroplakin 3B                                                                           | 7q11.2       |                                         |
| UQCC1     | ubiquinol-cytochrome c reductase complex assembly factor 1                             | 20q11.22     |                                         |



---

|          |                                                               |               |                       |
|----------|---------------------------------------------------------------|---------------|-----------------------|
| VENTXP3  | VENT homeobox pseudogene 3                                    | 12q21.1       |                       |
| VIT      | vitrin                                                        | 2p22.2        |                       |
| WHSC1L2P | Wolf-Hirschhorn syndrome candidate 1-like 2, pseudogene       | 17q21.31      |                       |
| WIF1     | WNT inhibitory factor 1                                       | 12q14.3       |                       |
| WLS      | wntless Wnt ligand secretion mediator                         | 1p31.3        |                       |
| WNT16    | wingless-type MMTV integration site family, member 16         | 7q31          | Wnt signaling pathway |
| WNT4     | wingless-type MMTV integration site family, member 4          | 1p36.23-p35.1 | Wnt signaling pathway |
| XKR9     | XK, Kell blood group complex subunit-related family, member 9 | 8q13.3        |                       |
| ZBTB40   | zinc finger and BTB domain containing 40                      | 1p36          |                       |
| ZNF408   | zinc finger protein 408                                       | 11p11.2       |                       |
| ZNF518B  | zinc finger protein 518B                                      | 4p16.1        |                       |
| ZNF622   | zinc finger protein 622                                       | 5p15.1        |                       |
| ZSWIM5   | zinc finger, SWIM-type containing 5                           | 1p34.1        |                       |

---

Table S2. Pathway enrichment analysis for the known osteoporosis-associated genes.

| KEGG ID  | Term                                   | Component genes                                        | Enrichment<br><i>P</i> -value | FDR<br><i>P</i> -value |
|----------|----------------------------------------|--------------------------------------------------------|-------------------------------|------------------------|
| hsa04310 | Wnt signaling pathway                  | DKK1, WIF1, CTNNB1, AXIN1, WNT4, PRICKLE1, WNT16, SOST | 8.10E-05                      | 2.33E-02               |
| hsa05217 | Basal cell carcinoma                   | CTNNB1, AXIN1, WNT4, WNT16                             | 2.49E-03                      | 3.57E-01               |
| hsa04022 | cGMP-PKG signaling pathway             | PRKCE, CACNA1D, PRKG2, KCNMA1, MEF2C, ADORA3           | 5.84E-03                      | 4.93E-01               |
| hsa05100 | Bacterial invasion of epithelial cells | DNM3, CTNNB1, ARHGAP10, DOCK1                          | 6.88E-03                      | 4.93E-01               |
| hsa04930 | Type II diabetes mellitus              | PRKCE, HK2, CACNA1D                                    | 1.12E-02                      | 6.09E-01               |
| hsa04972 | Pancreatic secretion                   | RAP1A, CD38, SLC4A4, KCNMA1                            | 1.41E-02                      | 6.09E-01               |
| hsa04340 | Hedgehog signaling pathway             | DHH, WNT4, WNT16                                       | 1.49E-02                      | 6.09E-01               |
| hsa04320 | Dorso-ventral axis formation           | FMN2, NOTCH4                                           | 2.14E-02                      | 7.66E-01               |
| hsa04919 | Thyroid hormone signaling pathway      | ESR1, NOTCH4, CTNNB1, WNT4                             | 3.14E-02                      | 9.90E-01               |
| hsa04917 | Prolactin signaling pathway            | ESR1, TNFRSF11A, TNFSF11                               | 3.45E-02                      | 9.90E-01               |
| hsa04380 | Osteoclast differentiation             | TNFRSF11B, TNFRSF11A, TNFSF11, CYLD                    | 3.87E-02                      | 1.00E+00               |
| hsa04010 | MAPK signaling pathway                 | CACNA1D, RAP1A, MAPT, MEF2C, RPS6AK5, FGF14            | 4.62E-02                      | 1.00E+00               |

Table S3. Functional enrichment analysis for all the epigenomic elements used in this study.

| No. | Type                             | Cell line | Epigenomic element | Osteoporosis genes | Random genes |
|-----|----------------------------------|-----------|--------------------|--------------------|--------------|
| 1   | Transcription Factor by ChIP-seq | Combined  | ARID3A             | 0.33               | -0.52        |
| 2   | Transcription Factor by ChIP-seq | Combined  | ATF1               | -0.54              | -0.46        |
| 3   | Transcription Factor by ChIP-seq | Combined  | ATF2               | 0.61               | -0.42        |
| 4   | Transcription Factor by ChIP-seq | Combined  | ATF3               | -0.98              | 0.32         |
| 5   | Transcription Factor by ChIP-seq | Combined  | BACH1              | -0.53              | -0.43        |
| 6   | Transcription Factor by ChIP-seq | Combined  | BATF               | 0.47               | 0.66         |
| 7   | Transcription Factor by ChIP-seq | Combined  | BCL11A             | 0.52               | 0.36         |
| 8   | Transcription Factor by ChIP-seq | Combined  | BCL3               | -0.84              | -0.87        |
| 9   | Transcription Factor by ChIP-seq | Combined  | BCLAF1             | -0.33              | -0.33        |
| 10  | Transcription Factor by ChIP-seq | Combined  | BDP1               | 0.28               | 0.53         |
| 11  | Transcription Factor by ChIP-seq | Combined  | BHLHE40            | -0.76              | -0.36        |
| 12  | Transcription Factor by ChIP-seq | Combined  | BRCA1              | -0.43              | -0.45        |
| 13  | Transcription Factor by ChIP-seq | Combined  | BRF1               | 0.29               | 0.00         |
| 14  | Transcription Factor by ChIP-seq | Combined  | BRF2               | 0.28               | 0.13         |
| 15  | Transcription Factor by ChIP-seq | Combined  | CBX3               | -0.54              | 0.46         |
| 16  | Transcription Factor by ChIP-seq | Combined  | CCNT2              | -0.53              | -0.76        |
| 17  | Transcription Factor by ChIP-seq | Combined  | CEBPB              | 0.31               | -0.37        |
| 18  | Transcription Factor by ChIP-seq | Combined  | CEBPD              | -0.40              | -0.43        |
| 19  | Transcription Factor by ChIP-seq | Combined  | CHD1               | 0.38               | 0.33         |
| 20  | Transcription Factor by ChIP-seq | Combined  | CHD2               | -0.35              | -0.66        |
| 21  | Transcription Factor by ChIP-seq | Combined  | CREB1              | -0.37              | -0.69        |
| 22  | Transcription Factor by ChIP-seq | Combined  | CTBP2              | 0.47               | 0.96         |
| 23  | Transcription Factor by ChIP-seq | Combined  | CTCF               | 0.46               | -0.41        |
| 24  | Transcription Factor by ChIP-seq | Combined  | CTCFL              | -0.88              | -0.48        |
| 25  | Transcription Factor by ChIP-seq | Combined  | E2F1               | 0.37               | -0.54        |
| 26  | Transcription Factor by ChIP-seq | Combined  | E2F4               | -0.81              | -0.39        |
| 27  | Transcription Factor by ChIP-seq | Combined  | E2F6               | -0.63              | -0.47        |
| 28  | Transcription Factor by ChIP-seq | Combined  | EBF1               | -0.45              | -0.33        |
| 29  | Transcription Factor by ChIP-seq | Combined  | EGR1               | 0.32               | -0.41        |
| 30  | Transcription Factor by ChIP-seq | Combined  | ELF1               | -0.77              | -0.66        |
| 31  | Transcription Factor by ChIP-seq | Combined  | ELK1               | -1.00              | -0.29        |
| 32  | Transcription Factor by ChIP-seq | Combined  | ELK4               | -1.86              | 0.40         |
| 33  | Transcription Factor by ChIP-seq | Combined  | EP300              | 0.77               | 0.45         |
| 34  | Transcription Factor by ChIP-seq | Combined  | ESR1               | 0.28               | 0.26         |
| 35  | Transcription Factor by ChIP-seq | Combined  | ESRRA              | -0.33              | 0.33         |
| 36  | Transcription Factor by ChIP-seq | Combined  | ETS1               | -1.01              | -0.42        |
| 37  | Transcription Factor by ChIP-seq | Combined  | EZH2               | 2.09               | -0.47        |
| 38  | Transcription Factor by ChIP-seq | Combined  | FAM48A             | -0.14              | 0.00         |
| 39  | Transcription Factor by ChIP-seq | Combined  | FOS                | -0.35              | 0.48         |
| 40  | Transcription Factor by ChIP-seq | Combined  | FOSL1              | -0.38              | 0.25         |
| 41  | Transcription Factor by ChIP-seq | Combined  | FOSL2              | 0.39               | -0.27        |
| 42  | Transcription Factor by ChIP-seq | Combined  | FOXA1              | 0.99               | -0.33        |
| 43  | Transcription Factor by ChIP-seq | Combined  | FOXA2              | 0.79               | 0.34         |
| 44  | Transcription Factor by ChIP-seq | Combined  | FOXM1              | 0.36               | 0.37         |
| 45  | Transcription Factor by ChIP-seq | Combined  | FOXP2              | 0.29               | -0.55        |

|    |                                  |          |        |       |       |
|----|----------------------------------|----------|--------|-------|-------|
| 46 | Transcription Factor by ChIP-seq | Combined | GABPA  | -0.92 | -0.46 |
| 47 | Transcription Factor by ChIP-seq | Combined | GATA1  | -0.67 | 0.28  |
| 48 | Transcription Factor by ChIP-seq | Combined | GATA2  | 0.45  | -0.31 |
| 49 | Transcription Factor by ChIP-seq | Combined | GATA3  | 0.90  | 0.74  |
| 50 | Transcription Factor by ChIP-seq | Combined | GRp20  | -0.66 | -0.51 |
| 51 | Transcription Factor by ChIP-seq | Combined | GTF2B  | -0.46 | -0.29 |
| 52 | Transcription Factor by ChIP-seq | Combined | GTF2F1 | 0.52  | -0.44 |
| 53 | Transcription Factor by ChIP-seq | Combined | GTF3C2 | -0.59 | 0.76  |
| 54 | Transcription Factor by ChIP-seq | Combined | HDAC1  | -1.34 | 0.29  |
| 55 | Transcription Factor by ChIP-seq | Combined | HDAC2  | 0.34  | -0.34 |
| 56 | Transcription Factor by ChIP-seq | Combined | HDAC6  | 0.00  | -0.43 |
| 57 | Transcription Factor by ChIP-seq | Combined | HDAC8  | 0.59  | 0.34  |
| 58 | Transcription Factor by ChIP-seq | Combined | HMGN3  | -0.66 | -0.53 |
| 59 | Transcription Factor by ChIP-seq | Combined | HNF4A  | -0.40 | -0.49 |
| 60 | Transcription Factor by ChIP-seq | Combined | HNF4G  | -0.29 | -0.28 |
| 61 | Transcription Factor by ChIP-seq | Combined | HSF1   | -0.24 | -0.39 |
| 62 | Transcription Factor by ChIP-seq | Combined | IKZF1  | 0.59  | 0.86  |
| 63 | Transcription Factor by ChIP-seq | Combined | IRF1   | -1.10 | -0.58 |
| 64 | Transcription Factor by ChIP-seq | Combined | IRF3   | 0.43  | -0.46 |
| 65 | Transcription Factor by ChIP-seq | Combined | IRF4   | 0.91  | 0.44  |
| 66 | Transcription Factor by ChIP-seq | Combined | JUN    | -0.32 | 0.71  |
| 67 | Transcription Factor by ChIP-seq | Combined | JUNB   | -0.55 | 1.06  |
| 68 | Transcription Factor by ChIP-seq | Combined | JUND   | 0.43  | -0.34 |
| 69 | Transcription Factor by ChIP-seq | Combined | KAP1   | 0.29  | -0.32 |
| 70 | Transcription Factor by ChIP-seq | Combined | KDM5A  | -0.37 | -0.70 |
| 71 | Transcription Factor by ChIP-seq | Combined | KDM5B  | -0.62 | -0.32 |
| 72 | Transcription Factor by ChIP-seq | Combined | MAFF   | 0.91  | -0.33 |
| 73 | Transcription Factor by ChIP-seq | Combined | MAFK   | 0.75  | -0.58 |
| 74 | Transcription Factor by ChIP-seq | Combined | MAX    | -0.40 | -0.66 |
| 75 | Transcription Factor by ChIP-seq | Combined | MAZ    | -0.55 | -0.40 |
| 76 | Transcription Factor by ChIP-seq | Combined | MBD4   | 0.62  | 0.36  |
| 77 | Transcription Factor by ChIP-seq | Combined | MEF2A  | 0.48  | 0.34  |
| 78 | Transcription Factor by ChIP-seq | Combined | MEF2C  | 0.42  | 0.43  |
| 79 | Transcription Factor by ChIP-seq | Combined | MTA3   | 0.35  | -0.37 |
| 80 | Transcription Factor by ChIP-seq | Combined | MXI1   | -0.50 | -0.43 |
| 81 | Transcription Factor by ChIP-seq | Combined | MYBL2  | 0.51  | -0.74 |
| 82 | Transcription Factor by ChIP-seq | Combined | MYC    | -0.53 | -0.45 |
| 83 | Transcription Factor by ChIP-seq | Combined | NANOG  | 0.68  | -0.51 |
| 84 | Transcription Factor by ChIP-seq | Combined | NFATC1 | 0.29  | 0.30  |
| 85 | Transcription Factor by ChIP-seq | Combined | NFE2   | -0.63 | -0.49 |
| 86 | Transcription Factor by ChIP-seq | Combined | NFIC   | -0.55 | -0.39 |
| 87 | Transcription Factor by ChIP-seq | Combined | NFYA   | -0.30 | -1.06 |
| 88 | Transcription Factor by ChIP-seq | Combined | NFYB   | 0.37  | -0.59 |
| 89 | Transcription Factor by ChIP-seq | Combined | NR2C2  | -0.46 | -0.54 |
| 90 | Transcription Factor by ChIP-seq | Combined | NR2F2  | -0.89 | 0.56  |
| 91 | Transcription Factor by ChIP-seq | Combined | NR3C1  | 0.43  | -0.42 |
| 92 | Transcription Factor by ChIP-seq | Combined | NRF1   | -0.55 | -0.36 |
| 93 | Transcription Factor by ChIP-seq | Combined | PAX5   | 0.52  | -0.50 |

|     |                                  |          |          |       |       |
|-----|----------------------------------|----------|----------|-------|-------|
| 94  | Transcription Factor by ChIP-seq | Combined | PBX3     | 0.29  | -0.71 |
| 95  | Transcription Factor by ChIP-seq | Combined | PHF8     | -0.68 | -0.39 |
| 96  | Transcription Factor by ChIP-seq | Combined | PML      | -0.40 | -0.44 |
| 97  | Transcription Factor by ChIP-seq | Combined | POLR2A   | 0.44  | -0.43 |
| 98  | Transcription Factor by ChIP-seq | Combined | POLR3G   | -0.14 | 0.00  |
| 99  | Transcription Factor by ChIP-seq | Combined | POU2F2   | 0.32  | 0.48  |
| 100 | Transcription Factor by ChIP-seq | Combined | POU5F1   | 0.69  | 0.48  |
| 101 | Transcription Factor by ChIP-seq | Combined | PPARGC1A | -0.22 | -0.27 |
| 102 | Transcription Factor by ChIP-seq | Combined | PRDM1    | 0.26  | -0.41 |
| 103 | Transcription Factor by ChIP-seq | Combined | RAD21    | 1.48  | -0.60 |
| 104 | Transcription Factor by ChIP-seq | Combined | RBBP5    | 0.74  | -0.48 |
| 105 | Transcription Factor by ChIP-seq | Combined | RCOR1    | -0.40 | -0.29 |
| 106 | Transcription Factor by ChIP-seq | Combined | RDBP     | 0.26  | 0.46  |
| 107 | Transcription Factor by ChIP-seq | Combined | RELA     | -0.34 | -0.35 |
| 108 | Transcription Factor by ChIP-seq | Combined | REST     | 0.31  | -0.35 |
| 109 | Transcription Factor by ChIP-seq | Combined | RFX5     | 0.48  | -0.94 |
| 110 | Transcription Factor by ChIP-seq | Combined | RPC155   | -0.34 | 0.77  |
| 111 | Transcription Factor by ChIP-seq | Combined | RUNX3    | 0.28  | 0.29  |
| 112 | Transcription Factor by ChIP-seq | Combined | RXRA     | -0.41 | 0.29  |
| 113 | Transcription Factor by ChIP-seq | Combined | SAP30    | -0.55 | -0.40 |
| 114 | Transcription Factor by ChIP-seq | Combined | SETDB1   | 0.43  | -0.29 |
| 115 | Transcription Factor by ChIP-seq | Combined | SIN3A    | 0.38  | -0.93 |
| 116 | Transcription Factor by ChIP-seq | Combined | SIN3AK20 | 0.48  | -0.32 |
| 117 | Transcription Factor by ChIP-seq | Combined | SIRT6    | -0.33 | 0.33  |
| 118 | Transcription Factor by ChIP-seq | Combined | SIX5     | -0.66 | -0.91 |
| 119 | Transcription Factor by ChIP-seq | Combined | SMARCA4  | 0.62  | -0.47 |
| 120 | Transcription Factor by ChIP-seq | Combined | SMARCB1  | 0.65  | -0.42 |
| 121 | Transcription Factor by ChIP-seq | Combined | SMARCC1  | 0.27  | -0.88 |
| 122 | Transcription Factor by ChIP-seq | Combined | SMARCC2  | 0.49  | -0.75 |
| 123 | Transcription Factor by ChIP-seq | Combined | SMC3     | -0.84 | -0.50 |
| 124 | Transcription Factor by ChIP-seq | Combined | SP1      | 0.60  | -0.74 |
| 125 | Transcription Factor by ChIP-seq | Combined | SP2      | -0.27 | -0.86 |
| 126 | Transcription Factor by ChIP-seq | Combined | SP4      | -0.48 | 0.45  |
| 127 | Transcription Factor by ChIP-seq | Combined | SPI1     | -0.51 | -0.28 |
| 128 | Transcription Factor by ChIP-seq | Combined | SREBP1   | -0.32 | -0.29 |
| 129 | Transcription Factor by ChIP-seq | Combined | SRF      | -0.72 | -0.51 |
| 130 | Transcription Factor by ChIP-seq | Combined | STAT1    | -0.49 | -0.53 |
| 131 | Transcription Factor by ChIP-seq | Combined | STAT2    | -0.36 | 0.43  |
| 132 | Transcription Factor by ChIP-seq | Combined | STAT3    | -0.60 | 0.42  |
| 133 | Transcription Factor by ChIP-seq | Combined | STAT5A   | -0.26 | 0.62  |
| 134 | Transcription Factor by ChIP-seq | Combined | SUZ12    | 0.93  | -0.26 |
| 135 | Transcription Factor by ChIP-seq | Combined | TAF1     | 0.68  | -0.38 |
| 136 | Transcription Factor by ChIP-seq | Combined | TAF7     | -0.51 | -0.73 |
| 137 | Transcription Factor by ChIP-seq | Combined | TAL1     | 0.37  | 0.38  |
| 138 | Transcription Factor by ChIP-seq | Combined | TBL1XR1  | -0.71 | -0.29 |
| 139 | Transcription Factor by ChIP-seq | Combined | TBP      | 0.38  | -0.40 |
| 140 | Transcription Factor by ChIP-seq | Combined | TCF12    | 1.16  | 0.29  |
| 141 | Transcription Factor by ChIP-seq | Combined | TCF3     | -0.28 | 0.33  |

|     |                                     |          |                   |       |       |
|-----|-------------------------------------|----------|-------------------|-------|-------|
| 142 | Transcription Factor by ChIP-seq    | Combined | TCF7L2            | 0.35  | -0.77 |
| 143 | Transcription Factor by ChIP-seq    | Combined | TEAD4             | -0.51 | -0.30 |
| 144 | Transcription Factor by ChIP-seq    | Combined | TFAP2A            | -0.54 | -1.34 |
| 145 | Transcription Factor by ChIP-seq    | Combined | TFAP2C            | -0.60 | -0.59 |
| 146 | Transcription Factor by ChIP-seq    | Combined | THAP1             | -0.46 | -0.57 |
| 147 | Transcription Factor by ChIP-seq    | Combined | TRIM28            | 0.46  | 0.63  |
| 148 | Transcription Factor by ChIP-seq    | Combined | UBTF              | -0.42 | -0.42 |
| 149 | Transcription Factor by ChIP-seq    | Combined | USF1              | -0.34 | -0.35 |
| 150 | Transcription Factor by ChIP-seq    | Combined | USF2              | 0.43  | -0.42 |
| 151 | Transcription Factor by ChIP-seq    | Combined | WRNIP1            | 0.28  | -0.43 |
| 152 | Transcription Factor by ChIP-seq    | Combined | YY1               | 0.48  | -0.40 |
| 153 | Transcription Factor by ChIP-seq    | Combined | ZBTB33            | -0.35 | -0.61 |
| 154 | Transcription Factor by ChIP-seq    | Combined | ZBTB7A            | -1.06 | -0.40 |
| 155 | Transcription Factor by ChIP-seq    | Combined | ZEB1              | -0.33 | -0.34 |
| 156 | Transcription Factor by ChIP-seq    | Combined | ZKSCAN1           | -0.26 | 0.43  |
| 157 | Transcription Factor by ChIP-seq    | Combined | ZNF143            | 0.39  | -0.63 |
| 158 | Transcription Factor by ChIP-seq    | Combined | ZNF217            | 1.02  | 0.24  |
| 159 | Transcription Factor by ChIP-seq    | Combined | ZNF263            | 0.52  | -0.28 |
| 160 | Transcription Factor by ChIP-seq    | Combined | ZNF274            | -0.14 | 0.18  |
| 161 | Transcription Factor by ChIP-seq    | Combined | ZZZ3              | -0.18 | 0.50  |
| 162 | Chromatin State Segmentation by HMM | Gm12878  | 1_Active_Promoter | -0.67 | 0.50  |
| 163 | Chromatin State Segmentation by HMM | Gm12878  | 10_Txn_Elongation | -1.46 | -0.26 |
| 164 | Chromatin State Segmentation by HMM | Gm12878  | 11_Weak_Txn       | -0.99 | 0.42  |
| 165 | Chromatin State Segmentation by HMM | Gm12878  | 12_Repressed      | 2.72  | 0.37  |
| 166 | Chromatin State Segmentation by HMM | Gm12878  | 13_Heterochrom/lo | -0.36 | 0.95  |
| 167 | Chromatin State Segmentation by HMM | Gm12878  | 14_Repetitive/CNV | 0.27  | 0.69  |
| 168 | Chromatin State Segmentation by HMM | Gm12878  | 15_Repetitive/CNV | -0.14 | 0.00  |
| 169 | Chromatin State Segmentation by HMM | Gm12878  | 2_Weak_Promoter   | -0.58 | -0.34 |
| 170 | Chromatin State Segmentation by HMM | Gm12878  | 3_Poised_Promoter | 2.22  | -0.29 |
| 171 | Chromatin State Segmentation by HMM | Gm12878  | 4_Strong_Enhancer | -0.41 | 0.50  |
| 172 | Chromatin State Segmentation by HMM | Gm12878  | 5_Strong_Enhancer | -0.31 | 0.51  |
| 173 | Chromatin State Segmentation by HMM | Gm12878  | 6_Weak_Enhancer   | -0.54 | -0.48 |
| 174 | Chromatin State Segmentation by HMM | Gm12878  | 7_Weak_Enhancer   | -0.44 | 0.41  |
| 175 | Chromatin State Segmentation by HMM | Gm12878  | 8_Insulator       | 0.44  | 0.36  |
| 176 | Chromatin State Segmentation by HMM | Gm12878  | 9_Txn_Transition  | 0.00  | 0.34  |
| 177 | Chromatin State Segmentation by HMM | HIhesc   | 1_Active_Promoter | -0.49 | 0.39  |
| 178 | Chromatin State Segmentation by HMM | HIhesc   | 10_Txn_Elongation | -1.37 | -0.34 |
| 179 | Chromatin State Segmentation by HMM | HIhesc   | 11_Weak_Txn       | -2.52 | -0.47 |
| 180 | Chromatin State Segmentation by HMM | HIhesc   | 12_Repressed      | 2.22  | -0.32 |
| 181 | Chromatin State Segmentation by HMM | HIhesc   | 13_Heterochrom/lo | 0.33  | 1.23  |
| 182 | Chromatin State Segmentation by HMM | HIhesc   | 14_Repetitive/CNV | -0.14 | 0.00  |
| 183 | Chromatin State Segmentation by HMM | HIhesc   | 15_Repetitive/CNV | 0.00  | 0.00  |
| 184 | Chromatin State Segmentation by HMM | HIhesc   | 2_Weak_Promoter   | -0.41 | 0.40  |
| 185 | Chromatin State Segmentation by HMM | HIhesc   | 3_Poised_Promoter | 3.07  | 0.37  |
| 186 | Chromatin State Segmentation by HMM | HIhesc   | 4_Strong_Enhancer | -0.46 | -0.34 |
| 187 | Chromatin State Segmentation by HMM | HIhesc   | 5_Strong_Enhancer | -0.35 | -0.66 |
| 188 | Chromatin State Segmentation by HMM | HIhesc   | 6_Weak_Enhancer   | -0.77 | 0.37  |
| 189 | Chromatin State Segmentation by HMM | HIhesc   | 7_Weak_Enhancer   | -0.80 | -0.39 |

|     |                                     |        |                   |       |       |
|-----|-------------------------------------|--------|-------------------|-------|-------|
| 190 | Chromatin State Segmentation by HMM | H1hesc | 8_Insulator       | 0.29  | -0.30 |
| 191 | Chromatin State Segmentation by HMM | H1hesc | 9_Txn_Transition  | 0.00  | -0.45 |
| 192 | Chromatin State Segmentation by HMM | Hepg2  | 1_Active_Promoter | -0.91 | 0.30  |
| 193 | Chromatin State Segmentation by HMM | Hepg2  | 10_Txn_Elongation | -2.10 | 0.73  |
| 194 | Chromatin State Segmentation by HMM | Hepg2  | 11_Weak_Txn       | -3.19 | -0.28 |
| 195 | Chromatin State Segmentation by HMM | Hepg2  | 12_Repressed      | 0.98  | -1.10 |
| 196 | Chromatin State Segmentation by HMM | Hepg2  | 13_Heterochrom/lo | 0.55  | 1.28  |
| 197 | Chromatin State Segmentation by HMM | Hepg2  | 14_Repetitive/CNV | 0.28  | 0.32  |
| 198 | Chromatin State Segmentation by HMM | Hepg2  | 15_Repetitive/CNV | 0.00  | 0.00  |
| 199 | Chromatin State Segmentation by HMM | Hepg2  | 2_Weak_Promoter   | -0.61 | -0.32 |
| 200 | Chromatin State Segmentation by HMM | Hepg2  | 3_Poised_Promoter | 1.04  | -0.36 |
| 201 | Chromatin State Segmentation by HMM | Hepg2  | 4_Strong_Enhancer | -0.61 | -0.32 |
| 202 | Chromatin State Segmentation by HMM | Hepg2  | 5_Strong_Enhancer | 0.31  | -0.99 |
| 203 | Chromatin State Segmentation by HMM | Hepg2  | 6_Weak_Enhancer   | -0.63 | 0.41  |
| 204 | Chromatin State Segmentation by HMM | Hepg2  | 7_Weak_Enhancer   | -0.68 | 0.97  |
| 205 | Chromatin State Segmentation by HMM | Hepg2  | 8_Insulator       | 0.32  | 0.53  |
| 206 | Chromatin State Segmentation by HMM | Hepg2  | 9_Txn_Transition  | -1.83 | 0.44  |
| 207 | Chromatin State Segmentation by HMM | Hmec   | 1_Active_Promoter | -0.55 | 0.35  |
| 208 | Chromatin State Segmentation by HMM | Hmec   | 10_Txn_Elongation | -1.61 | -0.90 |
| 209 | Chromatin State Segmentation by HMM | Hmec   | 11_Weak_Txn       | -1.78 | 0.68  |
| 210 | Chromatin State Segmentation by HMM | Hmec   | 12_Repressed      | 1.79  | -0.37 |
| 211 | Chromatin State Segmentation by HMM | Hmec   | 13_Heterochrom/lo | 0.32  | 0.59  |
| 212 | Chromatin State Segmentation by HMM | Hmec   | 14_Repetitive/CNV | 0.00  | 0.00  |
| 213 | Chromatin State Segmentation by HMM | Hmec   | 15_Repetitive/CNV | 0.00  | 0.00  |
| 214 | Chromatin State Segmentation by HMM | Hmec   | 2_Weak_Promoter   | -0.31 | 0.28  |
| 215 | Chromatin State Segmentation by HMM | Hmec   | 3_Poised_Promoter | 2.08  | 0.43  |
| 216 | Chromatin State Segmentation by HMM | Hmec   | 4_Strong_Enhancer | -0.32 | 0.46  |
| 217 | Chromatin State Segmentation by HMM | Hmec   | 5_Strong_Enhancer | -0.68 | 0.30  |
| 218 | Chromatin State Segmentation by HMM | Hmec   | 6_Weak_Enhancer   | 0.32  | 0.30  |
| 219 | Chromatin State Segmentation by HMM | Hmec   | 7_Weak_Enhancer   | -1.07 | 0.75  |
| 220 | Chromatin State Segmentation by HMM | Hmec   | 8_Insulator       | -0.28 | 0.73  |
| 221 | Chromatin State Segmentation by HMM | Hmec   | 9_Txn_Transition  | -1.29 | -0.27 |
| 222 | Chromatin State Segmentation by HMM | Hsmm   | 1_Active_Promoter | 0.34  | 0.60  |
| 223 | Chromatin State Segmentation by HMM | Hsmm   | 10_Txn_Elongation | -1.44 | -0.36 |
| 224 | Chromatin State Segmentation by HMM | Hsmm   | 11_Weak_Txn       | 0.28  | 0.45  |
| 225 | Chromatin State Segmentation by HMM | Hsmm   | 12_Repressed      | 0.77  | -0.67 |
| 226 | Chromatin State Segmentation by HMM | Hsmm   | 13_Heterochrom/lo | -0.45 | 1.05  |
| 227 | Chromatin State Segmentation by HMM | Hsmm   | 14_Repetitive/CNV | -0.33 | 0.20  |
| 228 | Chromatin State Segmentation by HMM | Hsmm   | 15_Repetitive/CNV | 0.00  | 0.00  |
| 229 | Chromatin State Segmentation by HMM | Hsmm   | 2_Weak_Promoter   | 0.41  | 0.32  |
| 230 | Chromatin State Segmentation by HMM | Hsmm   | 3_Poised_Promoter | 1.18  | -0.71 |
| 231 | Chromatin State Segmentation by HMM | Hsmm   | 4_Strong_Enhancer | -0.27 | 0.75  |
| 232 | Chromatin State Segmentation by HMM | Hsmm   | 5_Strong_Enhancer | 0.33  | 0.31  |
| 233 | Chromatin State Segmentation by HMM | Hsmm   | 6_Weak_Enhancer   | 0.41  | 0.72  |
| 234 | Chromatin State Segmentation by HMM | Hsmm   | 7_Weak_Enhancer   | -0.85 | 0.50  |
| 235 | Chromatin State Segmentation by HMM | Hsmm   | 8_Insulator       | 0.97  | -0.25 |
| 236 | Chromatin State Segmentation by HMM | Hsmm   | 9_Txn_Transition  | -1.28 | -0.25 |
| 237 | Chromatin State Segmentation by HMM | Huvec  | 1_Active_Promoter | -0.31 | 0.30  |

|     |                                     |       |                   |       |       |
|-----|-------------------------------------|-------|-------------------|-------|-------|
| 238 | Chromatin State Segmentation by HMM | Huvec | 10_Txn_Elongation | -1.25 | -0.34 |
| 239 | Chromatin State Segmentation by HMM | Huvec | 11_Weak_Txn       | -0.90 | -0.42 |
| 240 | Chromatin State Segmentation by HMM | Huvec | 12_Repressed      | 1.30  | 0.46  |
| 241 | Chromatin State Segmentation by HMM | Huvec | 13_Heterochrom/lo | -0.86 | 0.76  |
| 242 | Chromatin State Segmentation by HMM | Huvec | 14_Repetitive/CNV | 0.00  | 0.18  |
| 243 | Chromatin State Segmentation by HMM | Huvec | 15_Repetitive/CNV | -0.33 | 0.00  |
| 244 | Chromatin State Segmentation by HMM | Huvec | 2_Weak_Promoter   | 0.32  | 0.36  |
| 245 | Chromatin State Segmentation by HMM | Huvec | 3_Poised_Promoter | 0.77  | -0.39 |
| 246 | Chromatin State Segmentation by HMM | Huvec | 4_Strong_Enhancer | -0.28 | 0.42  |
| 247 | Chromatin State Segmentation by HMM | Huvec | 5_Strong_Enhancer | 0.26  | -0.28 |
| 248 | Chromatin State Segmentation by HMM | Huvec | 6_Weak_Enhancer   | 0.30  | -0.30 |
| 249 | Chromatin State Segmentation by HMM | Huvec | 7_Weak_Enhancer   | -0.43 | 0.36  |
| 250 | Chromatin State Segmentation by HMM | Huvec | 8_Insulator       | -0.30 | 0.36  |
| 251 | Chromatin State Segmentation by HMM | Huvec | 9_Txn_Transition  | -0.66 | 0.25  |
| 252 | Chromatin State Segmentation by HMM | K562  | 1_Active_Promoter | -0.91 | 0.28  |
| 253 | Chromatin State Segmentation by HMM | K562  | 10_Txn_Elongation | -1.25 | -0.26 |
| 254 | Chromatin State Segmentation by HMM | K562  | 11_Weak_Txn       | -0.89 | -0.33 |
| 255 | Chromatin State Segmentation by HMM | K562  | 12_Repressed      | 0.52  | -0.46 |
| 256 | Chromatin State Segmentation by HMM | K562  | 13_Heterochrom/lo | 0.55  | 1.02  |
| 257 | Chromatin State Segmentation by HMM | K562  | 14_Repetitive/CNV | 0.27  | -0.28 |
| 258 | Chromatin State Segmentation by HMM | K562  | 15_Repetitive/CNV | -0.21 | -0.28 |
| 259 | Chromatin State Segmentation by HMM | K562  | 2_Weak_Promoter   | -0.29 | -0.52 |
| 260 | Chromatin State Segmentation by HMM | K562  | 3_Poised_Promoter | -0.47 | -0.97 |
| 261 | Chromatin State Segmentation by HMM | K562  | 4_Strong_Enhancer | -0.98 | 0.43  |
| 262 | Chromatin State Segmentation by HMM | K562  | 5_Strong_Enhancer | -1.37 | 0.44  |
| 263 | Chromatin State Segmentation by HMM | K562  | 6_Weak_Enhancer   | 0.28  | -0.40 |
| 264 | Chromatin State Segmentation by HMM | K562  | 7_Weak_Enhancer   | -1.11 | 0.43  |
| 265 | Chromatin State Segmentation by HMM | K562  | 8_Insulator       | 0.34  | 0.58  |
| 266 | Chromatin State Segmentation by HMM | K562  | 9_Txn_Transition  | -1.04 | -1.14 |
| 267 | Chromatin State Segmentation by HMM | Nhek  | 1_Active_Promoter | -0.35 | 0.36  |
| 268 | Chromatin State Segmentation by HMM | Nhek  | 10_Txn_Elongation | -2.15 | -0.84 |
| 269 | Chromatin State Segmentation by HMM | Nhek  | 11_Weak_Txn       | -1.18 | 0.28  |
| 270 | Chromatin State Segmentation by HMM | Nhek  | 12_Repressed      | 1.24  | -0.53 |
| 271 | Chromatin State Segmentation by HMM | Nhek  | 13_Heterochrom/lo | -0.30 | 1.05  |
| 272 | Chromatin State Segmentation by HMM | Nhek  | 14_Repetitive/CNV | 0.00  | 0.32  |
| 273 | Chromatin State Segmentation by HMM | Nhek  | 15_Repetitive/CNV | 0.00  | 0.00  |
| 274 | Chromatin State Segmentation by HMM | Nhek  | 2_Weak_Promoter   | -0.30 | -0.36 |
| 275 | Chromatin State Segmentation by HMM | Nhek  | 3_Poised_Promoter | 1.70  | -0.79 |
| 276 | Chromatin State Segmentation by HMM | Nhek  | 4_Strong_Enhancer | -0.32 | 0.46  |
| 277 | Chromatin State Segmentation by HMM | Nhek  | 5_Strong_Enhancer | -0.79 | 0.38  |
| 278 | Chromatin State Segmentation by HMM | Nhek  | 6_Weak_Enhancer   | -0.28 | 0.36  |
| 279 | Chromatin State Segmentation by HMM | Nhek  | 7_Weak_Enhancer   | -0.39 | 0.50  |
| 280 | Chromatin State Segmentation by HMM | Nhek  | 8_Insulator       | 0.42  | 0.59  |
| 281 | Chromatin State Segmentation by HMM | Nhek  | 9_Txn_Transition  | -1.83 | 0.27  |
| 282 | Chromatin State Segmentation by HMM | Nhlf  | 1_Active_Promoter | -0.40 | 0.57  |
| 283 | Chromatin State Segmentation by HMM | Nhlf  | 10_Txn_Elongation | -2.63 | -0.25 |
| 284 | Chromatin State Segmentation by HMM | Nhlf  | 11_Weak_Txn       | -0.43 | 0.55  |
| 285 | Chromatin State Segmentation by HMM | Nhlf  | 12_Repressed      | 1.23  | 0.34  |



|     |                                     |               |                   |       |       |
|-----|-------------------------------------|---------------|-------------------|-------|-------|
| 286 | Chromatin State Segmentation by HMM | Nhlf          | 13_Heterochrom/lo | -0.42 | 0.80  |
| 287 | Chromatin State Segmentation by HMM | Nhlf          | 14_Repetitive/CNV | 0.00  | 0.13  |
| 288 | Chromatin State Segmentation by HMM | Nhlf          | 15_Repetitive/CNV | 0.00  | 0.00  |
| 289 | Chromatin State Segmentation by HMM | Nhlf          | 2_Weak_Promoter   | 0.78  | -0.38 |
| 290 | Chromatin State Segmentation by HMM | Nhlf          | 3_Poised_Promoter | 1.18  | -0.60 |
| 291 | Chromatin State Segmentation by HMM | Nhlf          | 4_Strong_Enhancer | -0.68 | 0.30  |
| 292 | Chromatin State Segmentation by HMM | Nhlf          | 5_Strong_Enhancer | -1.31 | -0.37 |
| 293 | Chromatin State Segmentation by HMM | Nhlf          | 6_Weak_Enhancer   | 0.94  | 0.28  |
| 294 | Chromatin State Segmentation by HMM | Nhlf          | 7_Weak_Enhancer   | -0.42 | -0.37 |
| 295 | Chromatin State Segmentation by HMM | Nhlf          | 8_Insulator       | 0.45  | 0.38  |
| 296 | Chromatin State Segmentation by HMM | Nhlf          | 9_Txn_Transition  | -0.80 | 0.34  |
| 297 | Histone Modifications by ChIP-seq   | A549          | CTCF              | -0.39 | -0.66 |
| 298 | Histone Modifications by ChIP-seq   | A549          | H2A.Z             | 0.82  | 0.34  |
| 299 | Histone Modifications by ChIP-seq   | A549          | H3K27ac           | 0.34  | -0.74 |
| 300 | Histone Modifications by ChIP-seq   | A549          | H3K27me3          | 2.38  | 0.33  |
| 301 | Histone Modifications by ChIP-seq   | A549          | H3K36me3          | -0.81 | -0.34 |
| 302 | Histone Modifications by ChIP-seq   | A549          | H3K4me1           | 0.31  | -0.59 |
| 303 | Histone Modifications by ChIP-seq   | A549          | H3K4me2           | 0.67  | -0.35 |
| 304 | Histone Modifications by ChIP-seq   | A549          | H3K4me3           | 0.69  | -0.43 |
| 305 | Histone Modifications by ChIP-seq   | A549          | H3K79me2          | -0.41 | -0.43 |
| 306 | Histone Modifications by ChIP-seq   | A549          | CTCF              | 0.46  | -0.59 |
| 307 | Histone Modifications by ChIP-seq   | A549          | H2A.Z             | 0.68  | -0.31 |
| 308 | Histone Modifications by ChIP-seq   | A549          | H3K27ac           | -0.42 | -0.34 |
| 309 | Histone Modifications by ChIP-seq   | A549          | H3K27me3          | 2.08  | -0.42 |
| 310 | Histone Modifications by ChIP-seq   | A549          | H3K36me3          | -1.00 | 0.30  |
| 311 | Histone Modifications by ChIP-seq   | A549          | H3K4me1           | 0.43  | -0.49 |
| 312 | Histone Modifications by ChIP-seq   | A549          | H3K4me2           | 0.60  | -0.37 |
| 313 | Histone Modifications by ChIP-seq   | A549          | H3K4me3           | 0.73  | 0.29  |
| 314 | Histone Modifications by ChIP-seq   | A549          | H3K79me2          | -0.39 | -0.54 |
| 315 | Histone Modifications by ChIP-seq   | A549          | H3K9ac            | 0.42  | -0.45 |
| 316 | Histone Modifications by ChIP-seq   | A549          | H3K9me3           | 0.84  | 0.70  |
| 317 | Histone Modifications by ChIP-seq   | A549          | H4K20me1          | -0.30 | -0.38 |
| 318 | Histone Modifications by ChIP-seq   | CD20+         | CTCF              | -0.29 | -0.56 |
| 319 | Histone Modifications by ChIP-seq   | CD20+         | H2A.Z             | 0.38  | -0.38 |
| 320 | Histone Modifications by ChIP-seq   | CD20+         | H3K4me2           | 0.51  | 0.35  |
| 321 | Histone Modifications by ChIP-seq   | CD20+_RO01794 | EZH2_(39875)      | 1.55  | 0.64  |
| 322 | Histone Modifications by ChIP-seq   | CD20+_RO01794 | H3K27ac           | -0.53 | 0.37  |
| 323 | Histone Modifications by ChIP-seq   | CD20+_RO01794 | H4K20me1          | -0.60 | -0.42 |
| 324 | Histone Modifications by ChIP-seq   | Dnd41         | CTCF              | -0.60 | -0.36 |
| 325 | Histone Modifications by ChIP-seq   | Dnd41         | EZH2_(39875)      | 0.46  | 0.30  |
| 326 | Histone Modifications by ChIP-seq   | Dnd41         | H2A.Z             | -0.50 | 0.59  |
| 327 | Histone Modifications by ChIP-seq   | Dnd41         | H3K27ac           | -1.39 | 0.45  |
| 328 | Histone Modifications by ChIP-seq   | Dnd41         | H3K27me3          | 1.10  | 0.30  |
| 329 | Histone Modifications by ChIP-seq   | Dnd41         | H3K36me3          | -2.23 | 0.39  |
| 330 | Histone Modifications by ChIP-seq   | Dnd41         | H3K4me1           | -0.82 | 0.37  |
| 331 | Histone Modifications by ChIP-seq   | Dnd41         | H3K4me2           | -0.58 | -0.35 |
| 332 | Histone Modifications by ChIP-seq   | Dnd41         | H3K4me3           | -0.51 | -0.36 |
| 333 | Histone Modifications by ChIP-seq   | Dnd41         | H3K79me2          | -1.19 | 0.37  |

|     |                                   |         |                      |       |       |
|-----|-----------------------------------|---------|----------------------|-------|-------|
| 334 | Histone Modifications by ChIP-seq | Dnd41   | H3K9ac               | -0.69 | -0.29 |
| 335 | Histone Modifications by ChIP-seq | Dnd41   | H3K9me3              | 0.59  | 0.55  |
| 336 | Histone Modifications by ChIP-seq | Dnd41   | H4K20me1             | -1.15 | 0.31  |
| 337 | Histone Modifications by ChIP-seq | GM12878 | CTCF                 | -0.35 | -0.61 |
| 338 | Histone Modifications by ChIP-seq | GM12878 | EZH2_(39875)         | 1.48  | 0.63  |
| 339 | Histone Modifications by ChIP-seq | GM12878 | H2A.Z                | 0.33  | -0.42 |
| 340 | Histone Modifications by ChIP-seq | GM12878 | H3K27ac              | -0.52 | 0.39  |
| 341 | Histone Modifications by ChIP-seq | GM12878 | H3K27me3             | 1.36  | 0.46  |
| 342 | Histone Modifications by ChIP-seq | GM12878 | H3K36me3             | -1.56 | 0.33  |
| 343 | Histone Modifications by ChIP-seq | GM12878 | H3K4me1              | -0.33 | -0.29 |
| 344 | Histone Modifications by ChIP-seq | GM12878 | H3K4me2              | 0.39  | -0.35 |
| 345 | Histone Modifications by ChIP-seq | GM12878 | H3K4me3              | 0.33  | -0.33 |
| 346 | Histone Modifications by ChIP-seq | GM12878 | H3K79me2             | -0.57 | 0.48  |
| 347 | Histone Modifications by ChIP-seq | GM12878 | H3K9ac               | -0.39 | -0.32 |
| 348 | Histone Modifications by ChIP-seq | GM12878 | H3K9me3              | 0.76  | 0.51  |
| 349 | Histone Modifications by ChIP-seq | GM12878 | H4K20me1             | -0.73 | -0.29 |
| 350 | Histone Modifications by ChIP-seq | H1hesc  | CHD1_(A301-218A)     | 0.49  | 0.30  |
| 351 | Histone Modifications by ChIP-seq | H1hesc  | CHD7_(A301-223A-1)   | 0.61  | 0.33  |
| 352 | Histone Modifications by ChIP-seq | H1hesc  | CTCF                 | 0.31  | -0.53 |
| 353 | Histone Modifications by ChIP-seq | H1hesc  | EZH2_(39875)         | 0.69  | -0.30 |
| 354 | Histone Modifications by ChIP-seq | H1hesc  | H2A.Z                | 1.05  | 0.60  |
| 355 | Histone Modifications by ChIP-seq | H1hesc  | H3K27ac              | -0.78 | -0.29 |
| 356 | Histone Modifications by ChIP-seq | H1hesc  | H3K27me3             | 1.99  | 0.30  |
| 357 | Histone Modifications by ChIP-seq | H1hesc  | H3K36me3             | -1.47 | -0.28 |
| 358 | Histone Modifications by ChIP-seq | H1hesc  | H3K4me1              | 0.48  | -0.37 |
| 359 | Histone Modifications by ChIP-seq | H1hesc  | H3K4me2              | 0.66  | 0.35  |
| 360 | Histone Modifications by ChIP-seq | H1hesc  | H3K4me3              | 0.87  | -0.35 |
| 361 | Histone Modifications by ChIP-seq | H1hesc  | H3K79me2             | -0.28 | -0.31 |
| 362 | Histone Modifications by ChIP-seq | H1hesc  | H3K9ac               | -0.36 | -0.32 |
| 363 | Histone Modifications by ChIP-seq | H1hesc  | H3K9me3              | -0.53 | 0.40  |
| 364 | Histone Modifications by ChIP-seq | H1hesc  | H4K20me1             | 0.37  | 0.37  |
| 365 | Histone Modifications by ChIP-seq | H1hesc  | HDAC2_(A300-705A)    | 0.68  | -0.48 |
| 366 | Histone Modifications by ChIP-seq | H1hesc  | HDAC6_(A301-341A)    | -0.64 | -0.52 |
| 367 | Histone Modifications by ChIP-seq | H1hesc  | JARID1A_(ab26049)    | 0.34  | 0.40  |
| 368 | Histone Modifications by ChIP-seq | H1hesc  | JMJD2A_(A300-861A-1) | 0.76  | 0.32  |
| 369 | Histone Modifications by ChIP-seq | H1hesc  | P300_KAT3B           | -0.38 | -0.35 |
| 370 | Histone Modifications by ChIP-seq | H1hesc  | PHF8_(A301-772A)     | 0.32  | -0.51 |
| 371 | Histone Modifications by ChIP-seq | H1hesc  | PLU1                 | -0.71 | -0.29 |
| 372 | Histone Modifications by ChIP-seq | H1hesc  | RBBP5_(A300-109A)    | 0.44  | 0.30  |
| 373 | Histone Modifications by ChIP-seq | H1hesc  | SAP30_(39731)        | 0.55  | -0.56 |
| 374 | Histone Modifications by ChIP-seq | H1hesc  | SIRT6                | -0.57 | 0.31  |
| 375 | Histone Modifications by ChIP-seq | H1hesc  | SUZ12_(05-1317)      | 0.83  | 0.44  |
| 376 | Histone Modifications by ChIP-seq | HeLa-S3 | CTCF                 | -0.51 | 0.50  |
| 377 | Histone Modifications by ChIP-seq | HeLa-S3 | EZH2_(39875)         | 0.84  | -0.57 |
| 378 | Histone Modifications by ChIP-seq | HeLa-S3 | H2A.Z                | 0.44  | 0.48  |
| 379 | Histone Modifications by ChIP-seq | HeLa-S3 | H3K27ac              | -0.62 | -0.33 |
| 380 | Histone Modifications by ChIP-seq | HeLa-S3 | H3K27me3             | 0.83  | -0.53 |
| 381 | Histone Modifications by ChIP-seq | HeLa-S3 | H3K36me3             | -0.59 | 0.54  |

|     |                                   |          |              |       |       |
|-----|-----------------------------------|----------|--------------|-------|-------|
| 382 | Histone Modifications by ChIP-seq | HeLa-S3  | H3K4me1      | -0.53 | 0.47  |
| 383 | Histone Modifications by ChIP-seq | HeLa-S3  | H3K4me2      | -0.48 | 0.48  |
| 384 | Histone Modifications by ChIP-seq | HeLa-S3  | H3K4me3      | -0.42 | 0.34  |
| 385 | Histone Modifications by ChIP-seq | HeLa-S3  | H3K79me2     | -0.68 | 0.33  |
| 386 | Histone Modifications by ChIP-seq | HeLa-S3  | H3K9ac       | -0.82 | -0.31 |
| 387 | Histone Modifications by ChIP-seq | HeLa-S3  | H3K9me3      | 1.12  | 0.28  |
| 388 | Histone Modifications by ChIP-seq | HeLa-S3  | H4K20me1     | -0.28 | 0.50  |
| 389 | Histone Modifications by ChIP-seq | HepG2    | CTCF         | -0.96 | -0.36 |
| 390 | Histone Modifications by ChIP-seq | HepG2    | EZH2_(39875) | 0.68  | -0.32 |
| 391 | Histone Modifications by ChIP-seq | HepG2    | H2A.Z        | 0.82  | 0.36  |
| 392 | Histone Modifications by ChIP-seq | HepG2    | H3K27ac      | -1.01 | -0.39 |
| 393 | Histone Modifications by ChIP-seq | HepG2    | H3K27me3     | 0.38  | 0.29  |
| 394 | Histone Modifications by ChIP-seq | HepG2    | H3K36me3     | -1.53 | 0.32  |
| 395 | Histone Modifications by ChIP-seq | HepG2    | H3K4me1      | -0.46 | 0.31  |
| 396 | Histone Modifications by ChIP-seq | HepG2    | H3K4me2      | -0.38 | -0.36 |
| 397 | Histone Modifications by ChIP-seq | HepG2    | H3K4me3      | -0.44 | -0.45 |
| 398 | Histone Modifications by ChIP-seq | HepG2    | H3K79me2     | -0.81 | 0.32  |
| 399 | Histone Modifications by ChIP-seq | HepG2    | H3K9ac       | -1.15 | 0.31  |
| 400 | Histone Modifications by ChIP-seq | HepG2    | H3K9me3      | -1.50 | 0.37  |
| 401 | Histone Modifications by ChIP-seq | HepG2    | H4K20me1     | -0.45 | 0.50  |
| 402 | Histone Modifications by ChIP-seq | Hmec     | CTCF         | 0.98  | 0.55  |
| 403 | Histone Modifications by ChIP-seq | Hmec     | EZH2_(39875) | -0.46 | -0.33 |
| 404 | Histone Modifications by ChIP-seq | Hmec     | H2A.Z        | 0.60  | -0.35 |
| 405 | Histone Modifications by ChIP-seq | Hmec     | H3K27ac      | -0.41 | 0.30  |
| 406 | Histone Modifications by ChIP-seq | Hmec     | H3K27me3     | 1.55  | -0.33 |
| 407 | Histone Modifications by ChIP-seq | Hmec     | H3K36me3     | -0.72 | 0.33  |
| 408 | Histone Modifications by ChIP-seq | Hmec     | H3K4me1      | 0.46  | -0.40 |
| 409 | Histone Modifications by ChIP-seq | Hmec     | H3K4me2      | 0.66  | 0.37  |
| 410 | Histone Modifications by ChIP-seq | Hmec     | H3K4me3      | 0.61  | -0.40 |
| 411 | Histone Modifications by ChIP-seq | Hmec     | H3K79me2     | -0.51 | 0.33  |
| 412 | Histone Modifications by ChIP-seq | Hmec     | H3K9ac       | 0.28  | 0.40  |
| 413 | Histone Modifications by ChIP-seq | Hmec     | H3K9me3      | -0.53 | 0.34  |
| 414 | Histone Modifications by ChIP-seq | Hmec     | H4K20me1     | 0.96  | -0.29 |
| 415 | Histone Modifications by ChIP-seq | Hsmm     | CTCF         | 0.34  | -0.56 |
| 416 | Histone Modifications by ChIP-seq | Hsmm     | EZH2_(39875) | 1.91  | 0.29  |
| 417 | Histone Modifications by ChIP-seq | Hsmm     | H2A.Z        | 0.59  | -0.30 |
| 418 | Histone Modifications by ChIP-seq | Hsmm     | H3K27ac      | -0.33 | -0.33 |
| 419 | Histone Modifications by ChIP-seq | Hsmm     | H3K27me3     | 1.22  | -0.29 |
| 420 | Histone Modifications by ChIP-seq | Hsmm     | H3K36me3     | -0.91 | 0.62  |
| 421 | Histone Modifications by ChIP-seq | Hsmm     | H3K4me1      | -0.37 | -0.31 |
| 422 | Histone Modifications by ChIP-seq | Hsmm     | H3K4me2      | 0.59  | -0.33 |
| 423 | Histone Modifications by ChIP-seq | Hsmm     | H3K4me3      | 0.68  | -0.29 |
| 424 | Histone Modifications by ChIP-seq | Hsmm     | H3K79me2     | 0.29  | 0.32  |
| 425 | Histone Modifications by ChIP-seq | Hsmm     | H3K9ac       | 0.32  | -0.34 |
| 426 | Histone Modifications by ChIP-seq | Hsmm     | H3K9me3      | 0.28  | 0.35  |
| 427 | Histone Modifications by ChIP-seq | Hsmm     | H4K20me1     | 0.51  | 0.45  |
| 428 | Histone Modifications by ChIP-seq | Hsmmtube | CTCF         | 0.46  | 0.64  |
| 429 | Histone Modifications by ChIP-seq | Hsmmtube | EZH2_(39875) | 0.49  | -0.37 |

|     |                                   |          |                    |       |       |
|-----|-----------------------------------|----------|--------------------|-------|-------|
| 430 | Histone Modifications by ChIP-seq | Hsmmtube | H2A.Z              | 0.59  | 0.32  |
| 431 | Histone Modifications by ChIP-seq | Hsmmtube | H3K27ac            | 0.31  | 0.32  |
| 432 | Histone Modifications by ChIP-seq | Hsmmtube | H3K27me3           | 1.08  | -0.34 |
| 433 | Histone Modifications by ChIP-seq | Hsmmtube | H3K36me3           | -1.28 | 0.33  |
| 434 | Histone Modifications by ChIP-seq | Hsmmtube | H3K4me1            | -0.28 | 0.35  |
| 435 | Histone Modifications by ChIP-seq | Hsmmtube | H3K4me2            | 0.53  | 0.29  |
| 436 | Histone Modifications by ChIP-seq | Hsmmtube | H3K4me3            | 0.53  | -0.30 |
| 437 | Histone Modifications by ChIP-seq | Hsmmtube | H3K79me2           | 0.42  | 0.38  |
| 438 | Histone Modifications by ChIP-seq | Hsmmtube | H3K9ac             | 0.31  | -0.35 |
| 439 | Histone Modifications by ChIP-seq | Hsmmtube | H3K9me3            | 1.03  | 0.79  |
| 440 | Histone Modifications by ChIP-seq | Hsmmtube | H4K20me1           | 0.46  | 0.86  |
| 441 | Histone Modifications by ChIP-seq | Huvec    | CTCF               | 0.49  | -0.32 |
| 442 | Histone Modifications by ChIP-seq | Huvec    | EZH2_(39875)       | 1.32  | -0.45 |
| 443 | Histone Modifications by ChIP-seq | Huvec    | H2A.Z              | 0.56  | 0.37  |
| 444 | Histone Modifications by ChIP-seq | Huvec    | H3K27ac            | 0.40  | -0.28 |
| 445 | Histone Modifications by ChIP-seq | Huvec    | H3K27me3           | 1.43  | 0.30  |
| 446 | Histone Modifications by ChIP-seq | Huvec    | H3K36me3           | -0.86 | -0.38 |
| 447 | Histone Modifications by ChIP-seq | Huvec    | H3K4me1            | 0.56  | -0.33 |
| 448 | Histone Modifications by ChIP-seq | Huvec    | H3K4me2            | 0.55  | -0.39 |
| 449 | Histone Modifications by ChIP-seq | Huvec    | H3K4me3            | 0.67  | -0.45 |
| 450 | Histone Modifications by ChIP-seq | Huvec    | H3K79me2           | -0.31 | 0.43  |
| 451 | Histone Modifications by ChIP-seq | Huvec    | H3K9ac             | 0.48  | -0.35 |
| 452 | Histone Modifications by ChIP-seq | Huvec    | H3K9me1            | 0.58  | 1.12  |
| 453 | Histone Modifications by ChIP-seq | Huvec    | H3K9me3            | -0.40 | 0.33  |
| 454 | Histone Modifications by ChIP-seq | Huvec    | H4K20me1           | 0.40  | 1.19  |
| 455 | Histone Modifications by ChIP-seq | K562     | CBP_(sc-369)       | -0.43 | -0.66 |
| 456 | Histone Modifications by ChIP-seq | K562     | CBX2               | 0.35  | 0.29  |
| 457 | Histone Modifications by ChIP-seq | K562     | CBX3_(SC-101004)   | -1.22 | -0.35 |
| 458 | Histone Modifications by ChIP-seq | K562     | CBX8               | 0.34  | -0.45 |
| 459 | Histone Modifications by ChIP-seq | K562     | CHD1_(A301-218A)   | -0.65 | -0.29 |
| 460 | Histone Modifications by ChIP-seq | K562     | CHD4_Mi2           | -1.50 | 0.31  |
| 461 | Histone Modifications by ChIP-seq | K562     | CHD7_(A301-223A-1) | -1.04 | 0.34  |
| 462 | Histone Modifications by ChIP-seq | K562     | CTCF               | -0.43 | 0.34  |
| 463 | Histone Modifications by ChIP-seq | K562     | EZH2_(39875)       | -0.44 | 0.33  |
| 464 | Histone Modifications by ChIP-seq | K562     | H2A.Z              | -0.91 | -0.32 |
| 465 | Histone Modifications by ChIP-seq | K562     | H3K27ac            | -1.22 | -0.35 |
| 466 | Histone Modifications by ChIP-seq | K562     | H3K27me3           | 0.71  | 0.64  |
| 467 | Histone Modifications by ChIP-seq | K562     | H3K36me3           | -0.72 | 0.39  |
| 468 | Histone Modifications by ChIP-seq | K562     | H3K4me1            | -1.25 | 0.30  |
| 469 | Histone Modifications by ChIP-seq | K562     | H3K4me2            | -0.64 | -0.30 |
| 470 | Histone Modifications by ChIP-seq | K562     | H3K4me3            | -0.45 | -0.35 |
| 471 | Histone Modifications by ChIP-seq | K562     | H3K79me2           | -0.96 | 0.42  |
| 472 | Histone Modifications by ChIP-seq | K562     | H3K9ac             | -0.91 | -0.36 |
| 473 | Histone Modifications by ChIP-seq | K562     | H3K9me1            | -0.63 | 0.31  |
| 474 | Histone Modifications by ChIP-seq | K562     | H3K9me3            | 0.74  | 0.60  |
| 475 | Histone Modifications by ChIP-seq | K562     | H4K20me1           | -0.95 | 0.31  |
| 476 | Histone Modifications by ChIP-seq | K562     | HDAC1_(SC-6298)    | -0.66 | 0.39  |
| 477 | Histone Modifications by ChIP-seq | K562     | HDAC2_(A300-705A)  | -0.57 | -0.59 |

|     |                                   |                 |                   |       |       |
|-----|-----------------------------------|-----------------|-------------------|-------|-------|
| 478 | Histone Modifications by ChIP-seq | K562            | HDAC6_(A301-341A) | -0.62 | -0.38 |
| 479 | Histone Modifications by ChIP-seq | K562            | LSD1              | -0.72 | -0.52 |
| 480 | Histone Modifications by ChIP-seq | K562            | NCoR              | -0.42 | 0.33  |
| 481 | Histone Modifications by ChIP-seq | K562            | NSD2_(ab75359)    | -1.71 | 0.33  |
| 482 | Histone Modifications by ChIP-seq | K562            | p300              | -0.72 | 0.36  |
| 483 | Histone Modifications by ChIP-seq | K562            | PCAF              | -0.50 | -0.39 |
| 484 | Histone Modifications by ChIP-seq | K562            | PHF8_(A301-772A)  | -0.47 | -0.49 |
| 485 | Histone Modifications by ChIP-seq | K562            | PLU1              | -0.91 | -0.34 |
| 486 | Histone Modifications by ChIP-seq | K562            | RBBP5_(A300-109A) | -0.76 | -0.43 |
| 487 | Histone Modifications by ChIP-seq | K562            | REST              | 0.32  | 0.36  |
| 488 | Histone Modifications by ChIP-seq | K562            | RNF2              | -0.67 | -0.63 |
| 489 | Histone Modifications by ChIP-seq | K562            | SAP30_(39731)     | -0.44 | -0.40 |
| 490 | Histone Modifications by ChIP-seq | K562            | SETDB1            | -0.65 | -0.37 |
| 491 | Histone Modifications by ChIP-seq | K562            | SIRT6             | -1.85 | 0.34  |
| 492 | Histone Modifications by ChIP-seq | K562            | SUZ12_(05-1317)   | -0.66 | -0.45 |
| 493 | Histone Modifications by ChIP-seq | Monocytes-CD14+ | CTCF              | -0.57 | -0.56 |
| 494 | Histone Modifications by ChIP-seq | Monocytes-CD14+ | H2A.Z             | 0.38  | 0.33  |
| 495 | Histone Modifications by ChIP-seq | Monocytes-CD14+ | H3K27ac           | -0.95 | -0.30 |
| 496 | Histone Modifications by ChIP-seq | Monocytes-CD14+ | H3K27me3          | 1.87  | 0.35  |
| 497 | Histone Modifications by ChIP-seq | Monocytes-CD14+ | H3K36me3          | -1.55 | 0.38  |
| 498 | Histone Modifications by ChIP-seq | Monocytes-CD14+ | H3K4me1           | -0.28 | 0.28  |
| 499 | Histone Modifications by ChIP-seq | Monocytes-CD14+ | H3K4me2           | 0.54  | 0.51  |
| 500 | Histone Modifications by ChIP-seq | Monocytes-CD14+ | H3K4me3           | 0.33  | -0.33 |
| 501 | Histone Modifications by ChIP-seq | Monocytes-CD14+ | H3K79me2          | -0.46 | -0.55 |
| 502 | Histone Modifications by ChIP-seq | Monocytes-CD14+ | H3K9ac            | -0.49 | -0.53 |
| 503 | Histone Modifications by ChIP-seq | Monocytes-CD14+ | H3K9me3           | 1.24  | 0.60  |
| 504 | Histone Modifications by ChIP-seq | Monocytes-CD14+ | H4K20me1          | -0.42 | -0.33 |
| 505 | Histone Modifications by ChIP-seq | NH-A            | CTCF              | 0.53  | 0.60  |
| 506 | Histone Modifications by ChIP-seq | NH-A            | EZH2_(39875)      | 0.91  | 0.63  |
| 507 | Histone Modifications by ChIP-seq | NH-A            | H2A.Z             | 0.77  | 0.39  |
| 508 | Histone Modifications by ChIP-seq | NH-A            | H3K27ac           | 0.48  | 0.39  |
| 509 | Histone Modifications by ChIP-seq | NH-A            | H3K27me3          | 1.64  | 0.28  |
| 510 | Histone Modifications by ChIP-seq | NH-A            | H3K36me3          | -0.92 | 0.32  |
| 511 | Histone Modifications by ChIP-seq | NH-A            | H3K4me1           | 0.61  | 0.37  |
| 512 | Histone Modifications by ChIP-seq | NH-A            | H3K4me2           | 0.75  | 0.36  |
| 513 | Histone Modifications by ChIP-seq | NH-A            | H3K4me3           | 0.65  | 0.38  |
| 514 | Histone Modifications by ChIP-seq | NH-A            | H3K79me2          | 0.32  | 0.72  |
| 515 | Histone Modifications by ChIP-seq | NH-A            | H3K9ac            | 0.46  | 0.45  |
| 516 | Histone Modifications by ChIP-seq | NH-A            | H3K9me3           | 0.36  | 0.37  |
| 517 | Histone Modifications by ChIP-seq | NH-A            | H4K20me1          | -0.34 | 0.35  |
| 518 | Histone Modifications by ChIP-seq | Nhdf-Ad         | CTCF              | 0.45  | 0.43  |
| 519 | Histone Modifications by ChIP-seq | Nhdf-Ad         | EZH2_(39875)      | 1.70  | -0.58 |
| 520 | Histone Modifications by ChIP-seq | Nhdf-Ad         | H2A.Z             | 0.61  | -0.29 |
| 521 | Histone Modifications by ChIP-seq | Nhdf-Ad         | H3K27ac           | -0.42 | 0.31  |
| 522 | Histone Modifications by ChIP-seq | Nhdf-Ad         | H3K27me3          | 1.26  | -0.67 |
| 523 | Histone Modifications by ChIP-seq | Nhdf-Ad         | H3K36me3          | -0.56 | 0.31  |
| 524 | Histone Modifications by ChIP-seq | Nhdf-Ad         | H3K4me1           | 0.49  | 0.37  |
| 525 | Histone Modifications by ChIP-seq | Nhdf-Ad         | H3K4me2           | 0.63  | -0.37 |

|     |                                   |         |              |       |       |
|-----|-----------------------------------|---------|--------------|-------|-------|
| 526 | Histone Modifications by ChIP-seq | Nhdf-Ad | H3K4me3      | 0.59  | -0.35 |
| 527 | Histone Modifications by ChIP-seq | Nhdf-Ad | H3K79me2     | -0.29 | 0.58  |
| 528 | Histone Modifications by ChIP-seq | Nhdf-Ad | H3K9ac       | -0.30 | -0.32 |
| 529 | Histone Modifications by ChIP-seq | Nhdf-Ad | H3K9me3      | -0.44 | 0.83  |
| 530 | Histone Modifications by ChIP-seq | Nhdf-Ad | H4K20me1     | -0.96 | 0.31  |
| 531 | Histone Modifications by ChIP-seq | Nhek    | CTCF         | -0.42 | 0.49  |
| 532 | Histone Modifications by ChIP-seq | Nhek    | EZH2_(39875) | 0.77  | 0.34  |
| 533 | Histone Modifications by ChIP-seq | Nhek    | H2A.Z        | 0.44  | -0.38 |
| 534 | Histone Modifications by ChIP-seq | Nhek    | H3K27ac      | -0.46 | -0.32 |
| 535 | Histone Modifications by ChIP-seq | Nhek    | H3K27me3     | 1.02  | -0.50 |
| 536 | Histone Modifications by ChIP-seq | Nhek    | H3K36me3     | -1.53 | -0.39 |
| 537 | Histone Modifications by ChIP-seq | Nhek    | H3K4me1      | -0.33 | -0.30 |
| 538 | Histone Modifications by ChIP-seq | Nhek    | H3K4me2      | 0.41  | 0.31  |
| 539 | Histone Modifications by ChIP-seq | Nhek    | H3K4me3      | 0.59  | -0.35 |
| 540 | Histone Modifications by ChIP-seq | Nhek    | H3K79me2     | -0.36 | 0.46  |
| 541 | Histone Modifications by ChIP-seq | Nhek    | H3K9ac       | -0.43 | -0.28 |
| 542 | Histone Modifications by ChIP-seq | Nhek    | H3K9me1      | -0.43 | 0.44  |
| 543 | Histone Modifications by ChIP-seq | Nhek    | H3K9me3      | -0.60 | 0.66  |
| 544 | Histone Modifications by ChIP-seq | Nhek    | H4K20me1     | -0.46 | -0.39 |
| 545 | Histone Modifications by ChIP-seq | Nhlf    | CTCF         | 0.32  | -0.36 |
| 546 | Histone Modifications by ChIP-seq | Nhlf    | EZH2_(39875) | 1.43  | -0.36 |
| 547 | Histone Modifications by ChIP-seq | Nhlf    | H2A.Z        | 0.46  | -0.30 |
| 548 | Histone Modifications by ChIP-seq | Nhlf    | H3K27ac      | -0.32 | 0.28  |
| 549 | Histone Modifications by ChIP-seq | Nhlf    | H3K27me3     | 0.78  | 0.29  |
| 550 | Histone Modifications by ChIP-seq | Nhlf    | H3K36me3     | -1.32 | 0.34  |
| 551 | Histone Modifications by ChIP-seq | Nhlf    | H3K4me1      | 0.40  | -0.42 |
| 552 | Histone Modifications by ChIP-seq | Nhlf    | H3K4me2      | 0.57  | -0.43 |
| 553 | Histone Modifications by ChIP-seq | Nhlf    | H3K4me3      | 0.55  | -0.33 |
| 554 | Histone Modifications by ChIP-seq | Nhlf    | H3K79me2     | 0.28  | 0.31  |
| 555 | Histone Modifications by ChIP-seq | Nhlf    | H3K9ac       | 0.33  | -0.42 |
| 556 | Histone Modifications by ChIP-seq | Nhlf    | H3K9me3      | -0.31 | 0.41  |
| 557 | Histone Modifications by ChIP-seq | Nhlf    | H4K20me1     | 0.31  | 0.72  |
| 558 | Histone Modifications by ChIP-seq | Osteobl | CTCF         | -0.34 | 0.46  |
| 559 | Histone Modifications by ChIP-seq | Osteobl | H2A.Z        | 0.64  | 0.39  |
| 560 | Histone Modifications by ChIP-seq | Osteobl | H3K27ac      | 0.40  | 0.36  |
| 561 | Histone Modifications by ChIP-seq | Osteobl | H3K27me3     | 1.10  | -0.44 |
| 562 | Histone Modifications by ChIP-seq | Osteobl | H3K36me3     | -0.87 | 0.60  |
| 563 | Histone Modifications by ChIP-seq | Osteobl | H3K4me1      | 0.72  | 0.40  |
| 564 | Histone Modifications by ChIP-seq | Osteobl | H3K4me2      | 0.82  | 0.29  |
| 565 | Histone Modifications by ChIP-seq | Osteobl | H3K4me3      | 0.76  | -0.34 |
| 566 | Histone Modifications by ChIP-seq | Osteobl | H3K79me2     | -0.31 | 0.72  |
| 567 | Histone Modifications by ChIP-seq | Osteobl | H3K9me3      | 0.28  | 0.40  |
| 568 | Histone Modifications by ChIP-seq | Osteobl | H4K20me1     | -0.42 | 0.49  |
| 569 | Histone Modifications by ChIP-seq | Osteobl | P300_KAT3B   | 1.37  | 0.60  |

Note: Epigenomic elements enriched with  $P$ -value  $< 0.01$  are highlighted in red while depleted epigenomic elements with  $P$ -value  $< 0.01$  are highlighted in green.

Table S4. Cell types used to obtain cell type-specific epigenomic elements.

| Cell          | Description                                                                                                                                                                                                                                                                       | Lineage         | Tissue              | Karyotype | Sex | Vendor ID                                                     | Label                                  |
|---------------|-----------------------------------------------------------------------------------------------------------------------------------------------------------------------------------------------------------------------------------------------------------------------------------|-----------------|---------------------|-----------|-----|---------------------------------------------------------------|----------------------------------------|
| A549          | epithelial cell line derived from a lung carcinoma tissue. (PMID: 175022), "This line was initiated in 1972 by D.J. Giard, et al. through explant culture of lung carcinomatous tissue from a 58-year-old caucasian male." - ATCC, newly promoted to tier 2: not in 2011 analysis | endoderm        | epithelium          | cancer    | M   | ATCC CCL-185                                                  | A549                                   |
| CD20+         | B cells from donors RO01778 and RO01794, newly promoted to tier 2: not in 2011 analysis                                                                                                                                                                                           | mesoderm        | blood               | normal    | F   | Dr. Heimfeld Lab at FHCRC<br>CD20+                            | <i>B-cells CD20+</i>                   |
| CD20+_RO01794 | B cells, African American, draw number 1, newly promoted to tier 2: not in 2011 analysis                                                                                                                                                                                          | mesoderm        | blood               | normal    | F   | Rajinder Kaul, UW<br>CD20+_RO01794                            | <i>B cells CD20+</i><br><i>RO01794</i> |
| Dnd41         | T cell leukemia with Notch mutation                                                                                                                                                                                                                                               | mesoderm        | blood               | cancer    | M   | DSMZ Dnd41                                                    | Dnd41                                  |
| GM12878       | B-lymphocyte, lymphoblastoid, International HapMap Project - CEPH/Utah - European Caucasion, Epstein-Barr Virus                                                                                                                                                                   | mesoderm        | blood               | normal    | F   | Coriell GM12878                                               | GM12878                                |
| H1-hESC       | embryonic stem cells                                                                                                                                                                                                                                                              | inner cell mass | embryonic stem cell | normal    | M   | WiCell Research Institute WA01                                | H1-hESC                                |
| HeLa-S3       | cervical carcinoma                                                                                                                                                                                                                                                                | ectoderm        | cervix              | cancer    | F   | ATCC CCL-2.2                                                  | HeLa-S3                                |
| HepG2         | hepatocellular carcinoma                                                                                                                                                                                                                                                          | endoderm        | liver               | cancer    | M   | ATCC HB-8065                                                  | HepG2                                  |
| HMEC          | mammary epithelial cells                                                                                                                                                                                                                                                          | ectoderm        | breast              | normal    | U   | Lonza CC-2551                                                 | HMEC                                   |
| HSMM          | skeletal muscle myoblasts                                                                                                                                                                                                                                                         | mesoderm        | muscle              | normal    | U   | Refer to the protocol documents for differing sources CC-2580 | HSMM                                   |
| HSMMtube      | skeletal muscle myotubes differentiated from the HSMM cell line                                                                                                                                                                                                                   | mesoderm        | muscle              | normal    | U   | Lonza See HSMM                                                | HSMMtube                               |
| HUVEC         | umbilical vein endothelial cells                                                                                                                                                                                                                                                  | mesoderm        | blood vessel        | normal    | U   | Lonza CC-2517                                                 | HUVEC                                  |
| K562          | leukemia, "The continuous cell line K-562 was established by Lozzio and Lozzio from the pleural effusion of a 53-year-old female with chronic myelogenous leukemia in terminal blast crises." - ATCC                                                                              | mesoderm        | blood               | cancer    | F   | ATCC CCL-243                                                  | K562                                   |
| NH-A          | astrocytes (also called Astrocy)                                                                                                                                                                                                                                                  | ectoderm        | brain               | normal    | U   | Lonza CC-2565                                                 | NH-A                                   |
| NHDF-Ad       | adult dermal fibroblasts                                                                                                                                                                                                                                                          | mesoderm        | skin                | normal    | F   | Lonza CC-2511, CC-2511T225                                    | NHDF-Ad                                |
| NHEK          | epidermal keratinocytes                                                                                                                                                                                                                                                           | ectoderm        | skin                | normal    | U   | Lonza CC-2501                                                 | NHEK                                   |

---

|                             |                                                                                                                                                                                                                                                                                   |          |           |        |   |                                                          |                                        |
|-----------------------------|-----------------------------------------------------------------------------------------------------------------------------------------------------------------------------------------------------------------------------------------------------------------------------------|----------|-----------|--------|---|----------------------------------------------------------|----------------------------------------|
| NHLF                        | lung fibroblasts                                                                                                                                                                                                                                                                  | endoderm | lung      | normal | U | Lonza CC-2512                                            | NHLF                                   |
| Osteobl                     | osteoblasts (NHost)                                                                                                                                                                                                                                                               | mesoderm | bone      | normal | U | Lonza CC-2538                                            | <i>Osteoblasts</i>                     |
| Monocytes-CD14+<br>_RO01746 | Monocytes-CD14+ are CD14-positive cells from human leukapheresis production, from donor RO 01746 (draw 1 ID is RO 01746, draw 2 ID is RO 01826), Monocytes-CD14+_RO01746 and Monocytes-CD14+_RO01826 are being used as replicates, newly promoted to tier 2: not in 2011 analysis | mesoderm | monocytes | normal | F | S. Heimfeld Laboratory, FHCRC<br>Monocytes-CD14+_RO01746 | <i>Monocytes<br/>CD14+<br/>RO01746</i> |

---



Table S5. siRNA sequences for *BDNF*.

| siRNA  |           | Sequence              |
|--------|-----------|-----------------------|
| siRNA1 | Sense     | CAGUAUUUCUACGAGACCATT |
|        | Antisense | UGGUCUCGUAGAAAUACUGTT |
| siRNA2 | Sense     | CGAUUCAUAAGGAUAGACATT |
|        | Antisense | UGUCUAUCCUUAUGAAUCGTT |

Table S6. Primer sequences for PCR analyses.

| Gene  |         | Primer sequence           |
|-------|---------|---------------------------|
| BDNF  | Forward | GATGCCGCAAACATGTCTATGA    |
|       | Reverse | TAATACTGTCACACACGCTCAGCTC |
| ALP   | Forward | ACACCTTGACTGTGGTTACTGCTGA |
|       | Reverse | CCTTGTAGCCAGGCCCGTTA      |
| COL1  | Forward | GGGGCAAGACAGTCATCGAA      |
|       | Reverse | GGTGGGAGGGAACCAGATTG      |
| RUNX2 | Forward | CGCCCTCCCTGAACTCT         |
|       | Reverse | TGCCTGCCTGGGATCTGTA       |
| OCN   | Forward | CTGACAAAGCCTTCATGTCCAA    |
|       | Reverse | GCGCCGGAGTCTGTTCATA       |
| GAPDH | Forward | ACTGAGGACCAGGTTGTC        |
|       | Reverse | TGCTGTAGCCGTATTCATTG      |
